# Supplementary material
Source: Research Square preprint supplement (doi:10.21203/rs.3.rs-9510920/v1)
Supplement: Supplementary file 1 [file 7e9b9bc258877814def84031.pdf]

001  
002  
003  
004  
005  
006  
007  
008  
009  
010  
011  
012  
013  
014  
015  
016  
017  
018  
019  
020  
021  
022  
023  
024  
025  
026  
027  
028  
029  
030  
031  
032  
033  
034  
035  
036  
037  
038  
039  
040  
041  
042  
043  
044  
045  
046  
047  
048  
049  
050  
051  
052  
053  
054  
055  
056  
057  
058  
059

Supplementary Information for:

# Rates of Antarctic Ice Sheet thinning since Last Glacial Maximum rival future projections

**Roger Creel<sup>1,\*</sup>**  
**Ryan Venturelli<sup>2</sup>**  
**Anna Ruth Halberstadt<sup>3</sup>**  
**Sam Chester<sup>4</sup>**  
**Ava Nordgren<sup>3</sup>**  
**John Schiavo<sup>4</sup>**

<sup>1</sup>Department of Geology and Geophysics, Texas A&M University, 3115 TAMU, College Station, Texas, 77843, USA.

<sup>2</sup>Department of Geology and Geological Engineering, Colorado School of Mines, Berthoud Hall 411E, Golden, Colorado, 80401, USA.

<sup>3</sup>Department of Earth & Planetary Sciences, Jackson School of Earth Sciences, University of Texas at Austin, 2305 Speedway Suite 2.112, Austin, Texas, 78712, USA.

<sup>4</sup>Lamont-Doherty Earth Observatory, Columbia University of New York, 61 Route 9W, Palisades, 10964, New York, USA.

**\*Corresponding author**  
E-mail: roger.creel@tamu.edu

060 **Supplementary Overview**

061 This Supplement contains 4 subsections, which provide extended analyses and supporting figures. The  
 062 sections are organized as follows:  
 063

- 064 1. **Site-by-site comparisons of past, present, and future thinning rates**
- 065 2. **Skytrain Ice Rise thinning profile**
- 066 3. **PATR sensitivity to modeling choices**
- 067 4. **Site-by-site comparison of PATR to data**

069 **1 Site-by-site comparisons of past, present, and future thinning rates**

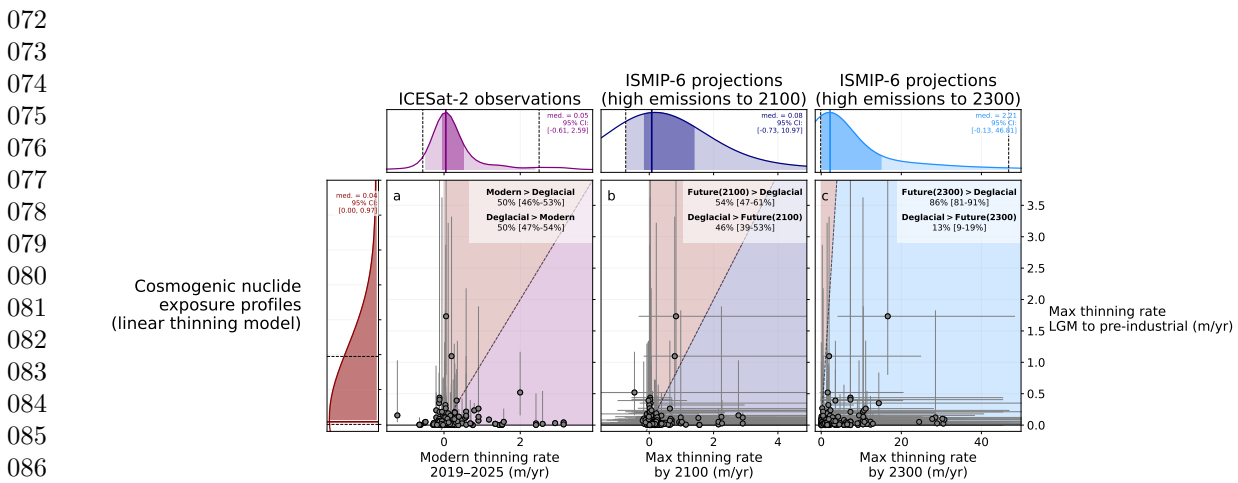

087 **Fig. S1 Site-by-site comparison of past to modern and future local decadal ice thinning rates.** As in Figure ??,  
 088 but modern and future rates are compared to cosmogenic nuclide exposure profiles fit with probabilistic linear orthogonal  
 089 distance regression models. See Figure ?? caption and Methods for more details.

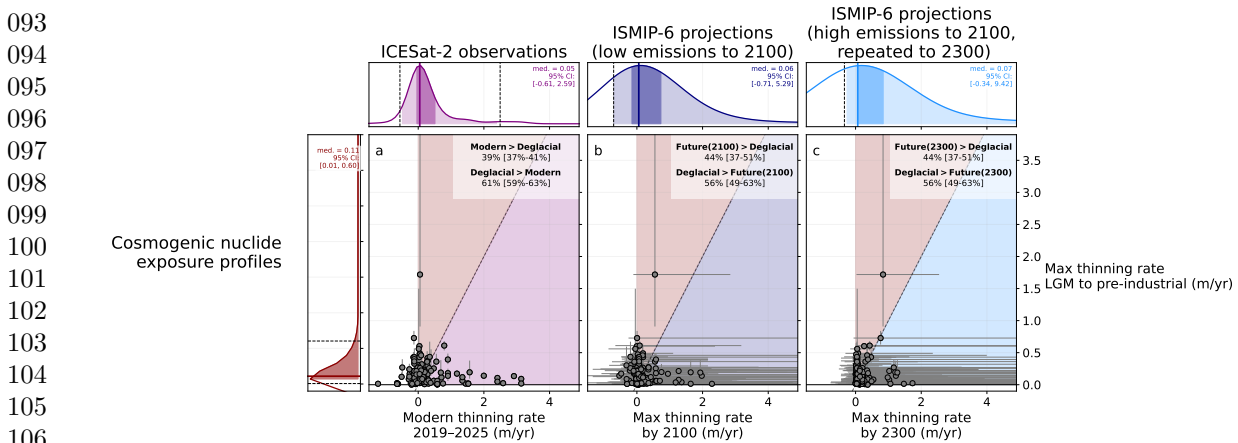

107 **Fig. S2 Additional comparison of past to modern and future ice thinning rates.** As in Figure ??, but (b)  
 108 depicts ISMIP-6 projections to 2100 under a low emissions scenario (SSP1-2.6) and (c) shows ISMIP-6 projections to 2300  
 109 with high emissions forcing (RCP8.5 / SSP5-8.5) to 2100, then 2100 forcing repeated to 2300 [1]. See Figure ?? caption  
 110 for more details.

## 2 Skytrain Ice Rise thinning profile

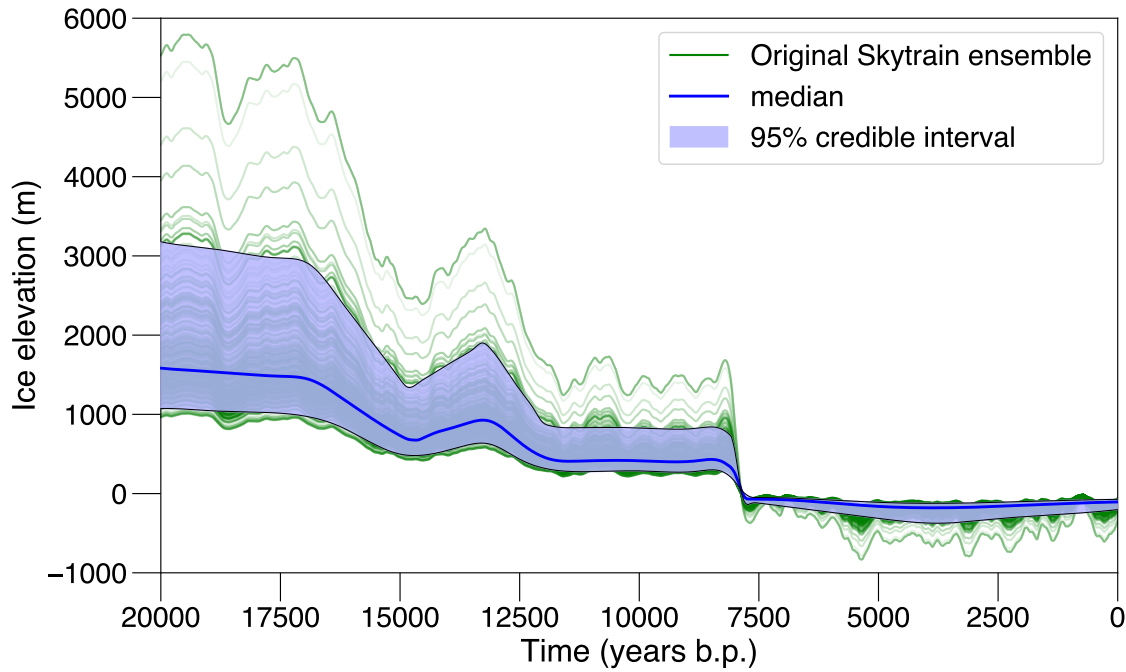

**Fig. S3 Postglacial ice thinning rates from the Skytrain Ice Rise.** Green lines indicate ice elevations derived from oxygen isotope measurements in the Skytrain Ice Rise [2]. Blue envelope marks median and 95% credible interval computed using segmented linear regression.

## 3 PATR sensitivity to modeling choices

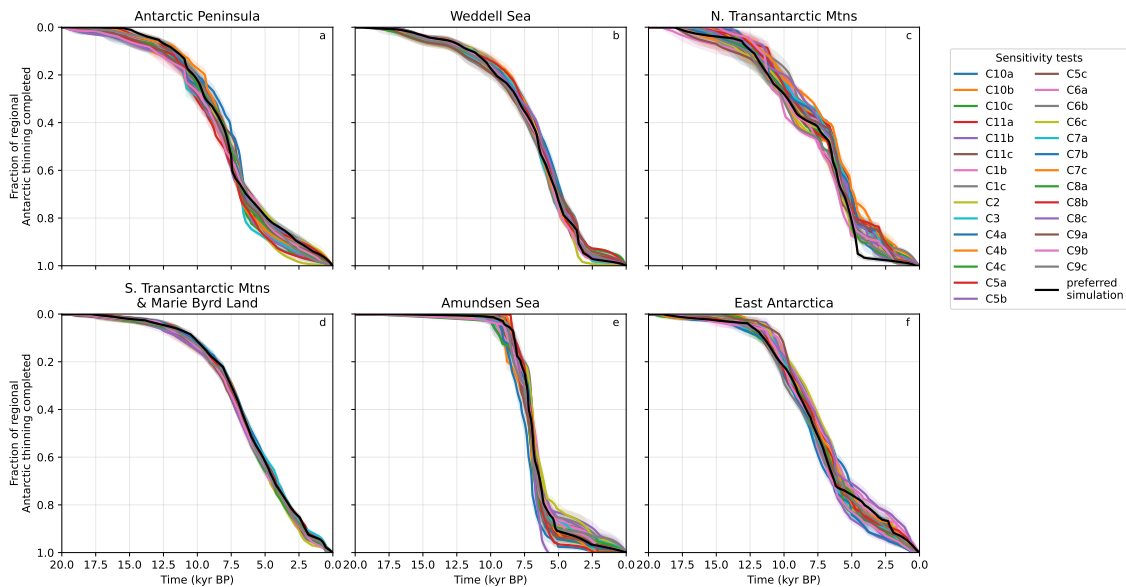

**Fig. S4 Tests demonstrating sensitivity of PATR to model parameters.** Colored lines and envelopes indicate fractional Antarctic Ice Sheet thinning completed for sensitivity tests for each Antarctic region (see Methods); black line marks preferred PATR reconstruction.

178  
179  
180  
181  
182  
183  
184  
185  
186  
187  
188  
189  
190  
191  
192  
193  
194  
195  
196  
197  
198  
199  
200  
201  
202  
203  
204  
205  
206  
207  
208  
209  
210  
211  
212  
213  
214  
215  
216  
217  
218  
219  
220  
221  
222  
223  
224  
225  
226  
227  
228  
229  
230  
231  
232  
233  
234  
235  
236

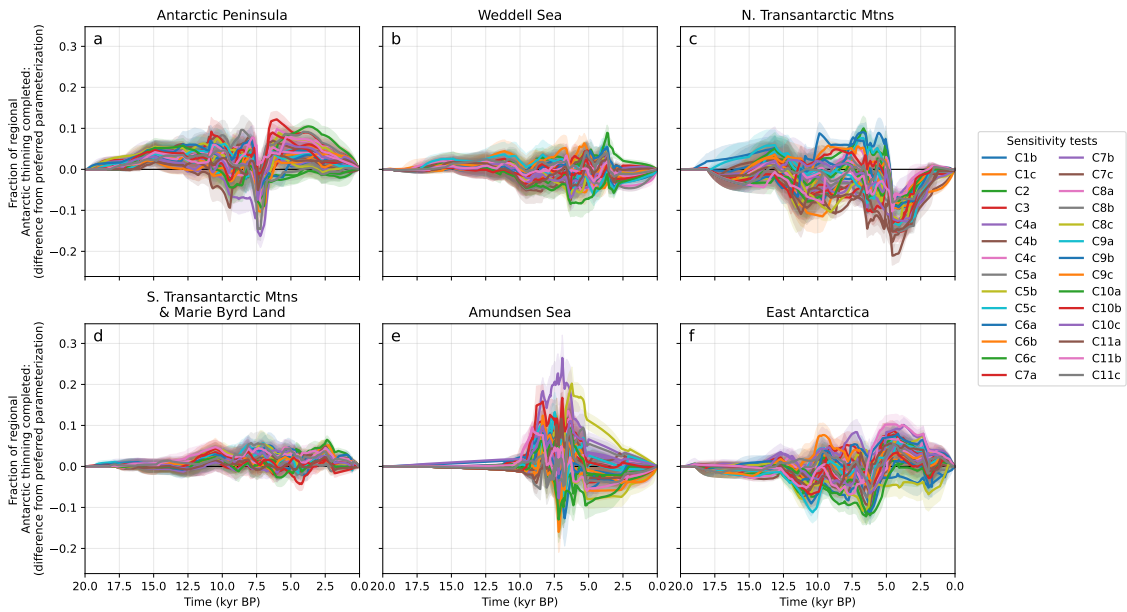

**Fig. S5 Tests demonstrating sensitivity of PATR to model parameters.** Colored lines and envelopes indicate difference in fractional Antarctic Ice Sheet thinning completed for each Antarctic region between the preferred parameterization and all sensitivity tests (see Methods).

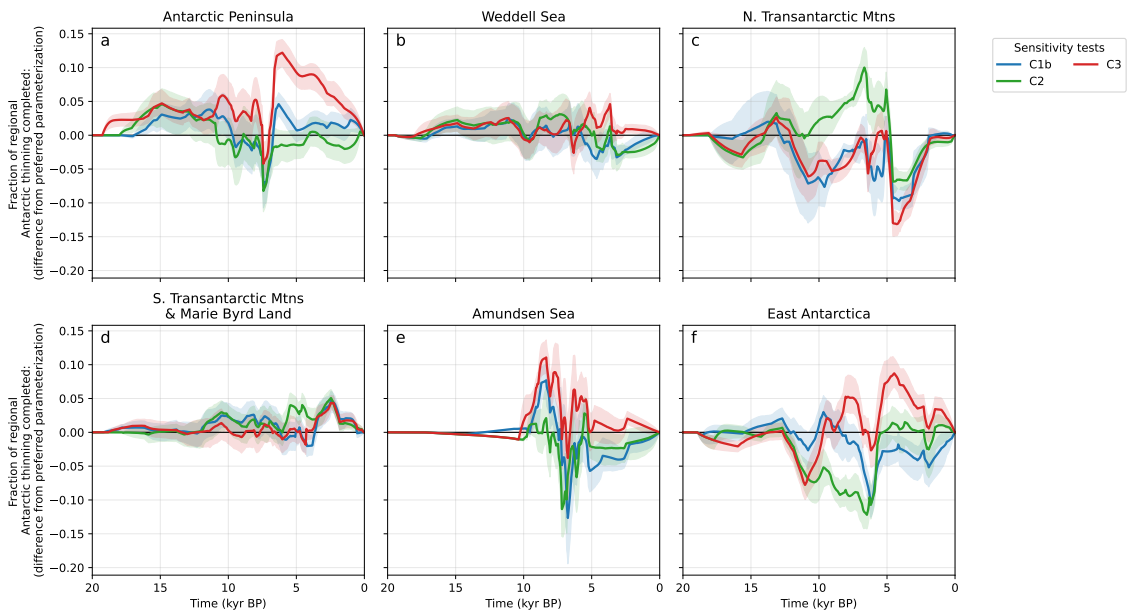

**Fig. S6 Tests demonstrating sensitivity of PATR to model parameters.** Colored lines and envelopes indicate difference in fractional Antarctic Ice Sheet thinning completed for each Antarctic region between the preferred parameterization and sensitivity tests C1a, C1b, C1c, C2, and C3 (see Methods).

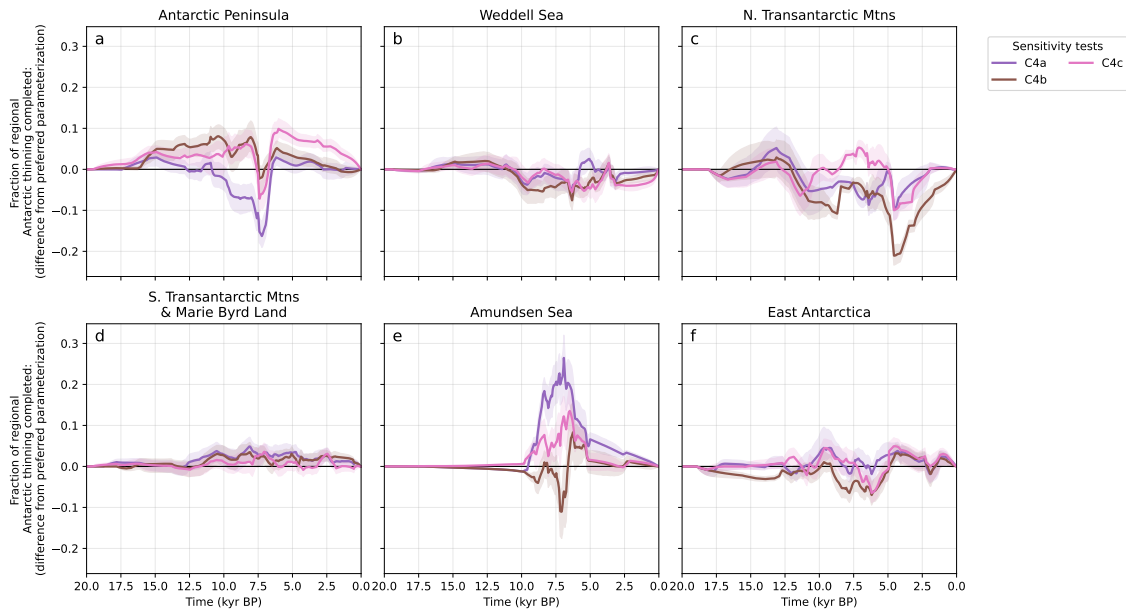

**Fig. S7 Tests demonstrating sensitivity of PATR to model parameters.** Colored lines and envelopes indicate difference in fractional Antarctic Ice Sheet thinning completed for each Antarctic region between the preferred parameterization and sensitivity tests C4a, C4b, and C4c (see Methods).

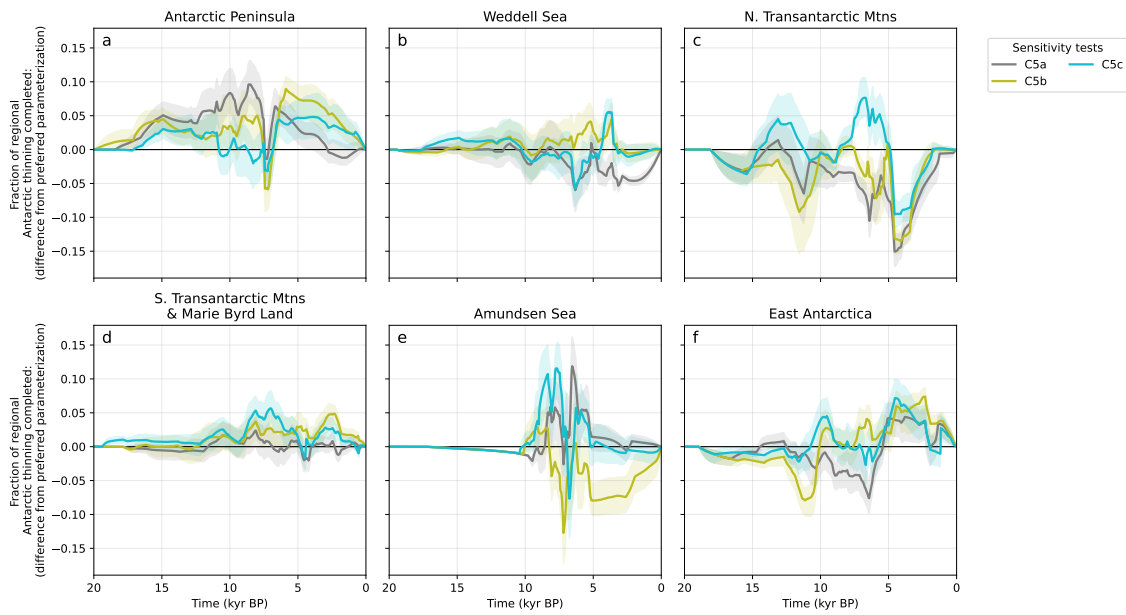

**Fig. S8 Tests demonstrating sensitivity of PATR to model parameters.** Colored lines and envelopes indicate difference in fractional Antarctic Ice Sheet thinning completed for each Antarctic region between the preferred parameterization and sensitivity tests C5a, C5b, and C5c (see Methods).

237  
238  
239  
240  
241  
242  
243  
244  
245  
246  
247  
248  
249  
250  
251  
252  
253  
254  
255  
256  
257  
258  
259  
260  
261  
262  
263  
264  
265  
266  
267  
268  
269  
270  
271  
272  
273  
274  
275  
276  
277  
278  
279  
280  
281  
282  
283  
284  
285  
286  
287  
288  
289  
290  
291  
292  
293  
294  
295

296  
 297  
 298  
 299  
 300  
 301  
 302  
 303  
 304  
 305  
 306  
 307  
 308  
 309  
 310  
 311  
 312  
 313  
 314  
 315  
 316  
 317  
 318  
 319  
 320  
 321  
 322  
 323  
 324  
 325  
 326  
 327  
 328  
 329  
 330  
 331  
 332  
 333  
 334  
 335  
 336  
 337  
 338  
 339  
 340  
 341  
 342  
 343  
 344  
 345  
 346  
 347  
 348  
 349  
 350  
 351  
 352  
 353  
 354

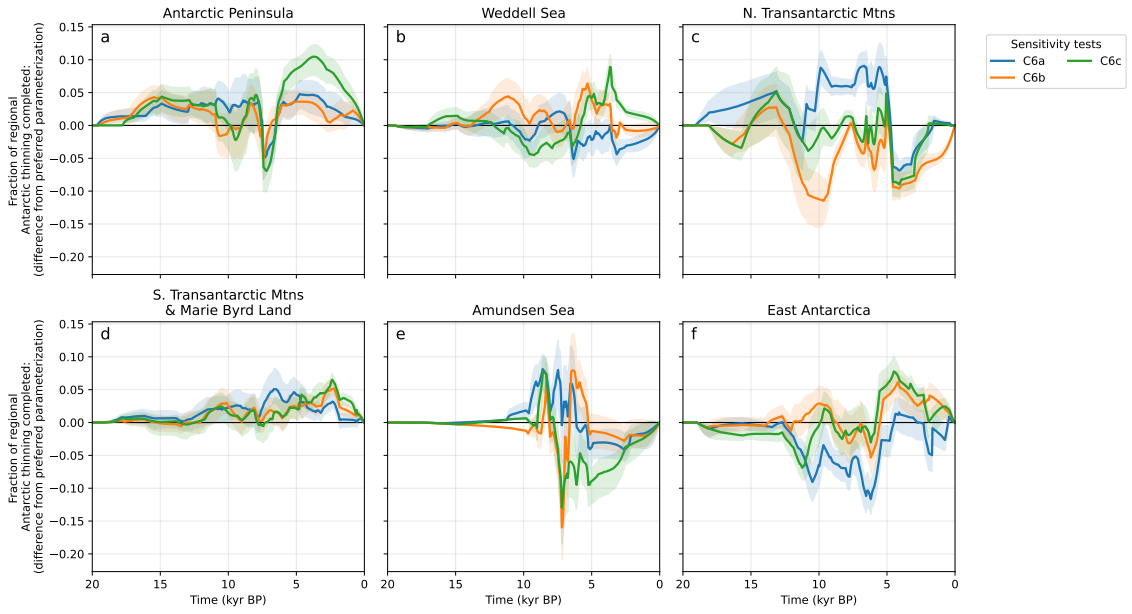

**Fig. S9 Tests demonstrating sensitivity of PATR to model parameters.** Colored lines and envelopes indicate difference in fractional Antarctic Ice Sheet thinning completed for each Antarctic region between the preferred parameterization and sensitivity tests C6a, C6b, and C6c (see Methods).

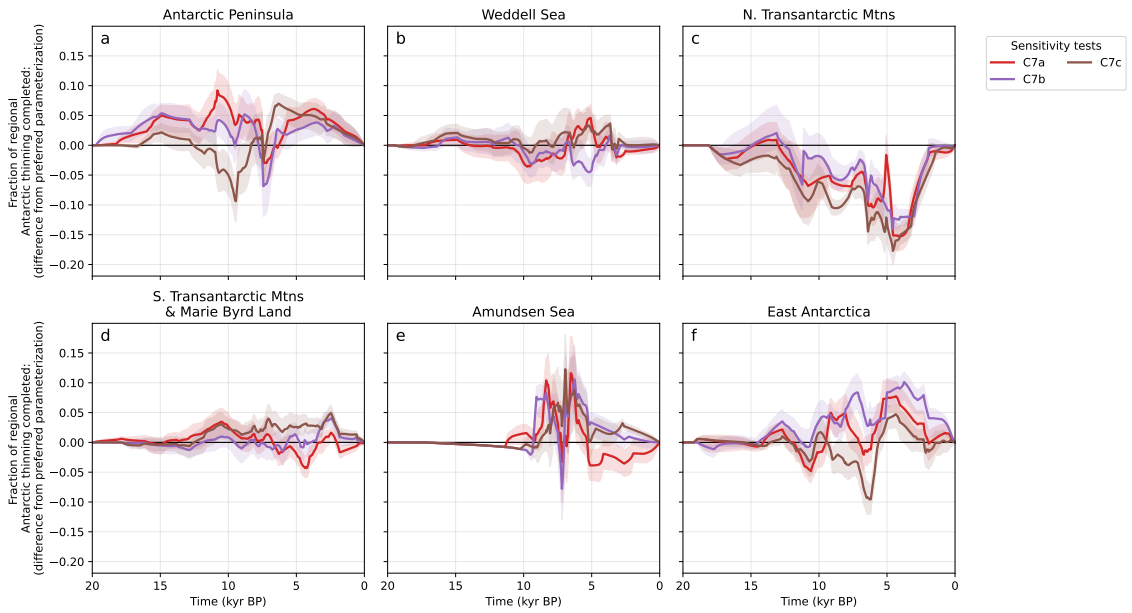

**Fig. S10 Tests demonstrating sensitivity of PATR to model parameters.** Colored lines and envelopes indicate difference in fractional Antarctic Ice Sheet thinning completed for each Antarctic region between the preferred parameterization and sensitivity tests C7a, C7b, and C7c (see Methods).

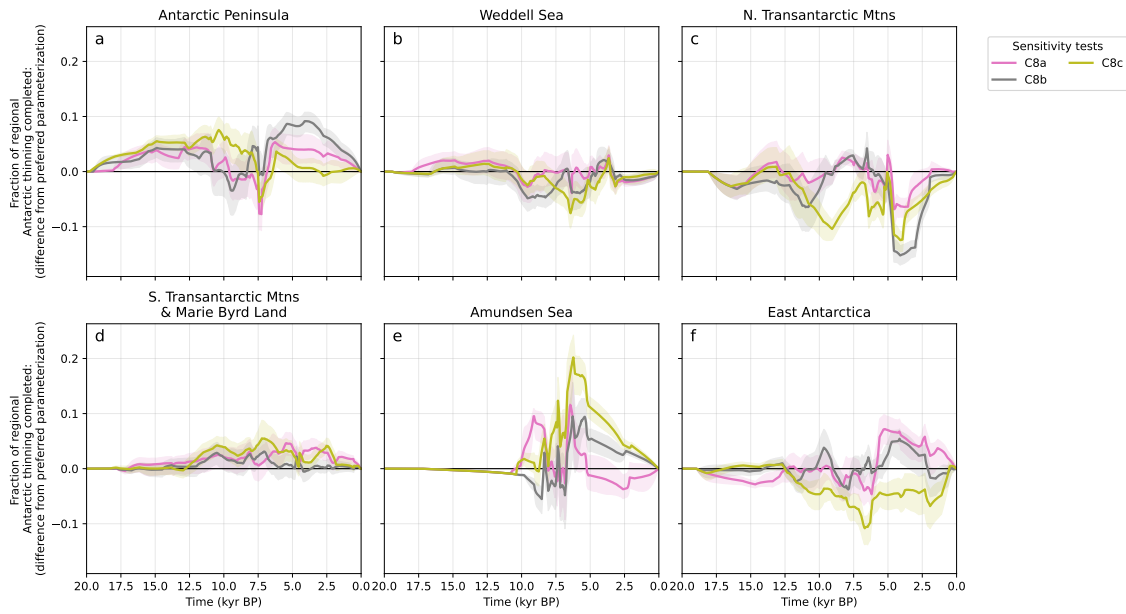

**Fig. S11 Tests demonstrating sensitivity of PATR to model parameters.** Colored lines and envelopes indicate difference in fractional Antarctic Ice Sheet thinning completed for each Antarctic region between the preferred parameterization and sensitivity tests C8a, C8b, and C8c (see Methods).

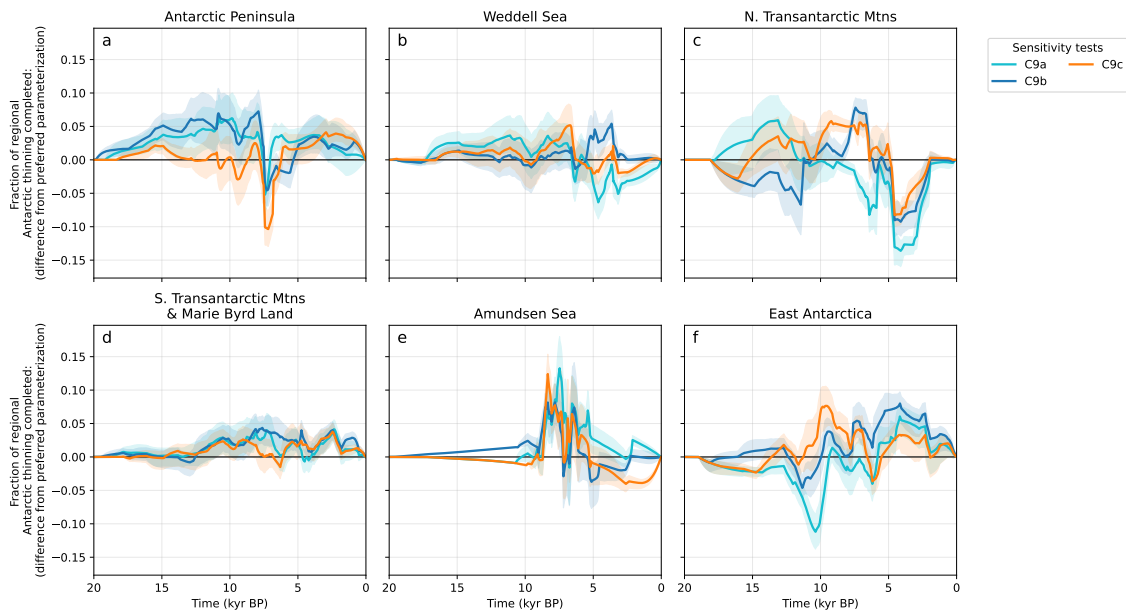

**Fig. S12 Tests demonstrating sensitivity of PATR to model parameters.** Colored lines and envelopes indicate difference in fractional Antarctic Ice Sheet thinning completed for each Antarctic region between the preferred parameterization and sensitivity tests C9a, C9b, and C9c (see Methods).

355  
356  
357  
358  
359  
360  
361  
362  
363  
364  
365  
366  
367  
368  
369  
370  
371  
372  
373  
374  
375  
376  
377  
378  
379  
380  
381  
382  
383  
384  
385  
386  
387  
388  
389  
390  
391  
392  
393  
394  
395  
396  
397  
398  
399  
400  
401  
402  
403  
404  
405  
406  
407  
408  
409  
410  
411  
412  
413

414  
 415  
 416  
 417  
 418  
 419  
 420  
 421  
 422  
 423  
 424  
 425  
 426  
 427  
 428  
 429  
 430  
 431  
 432  
 433  
 434  
 435  
 436  
 437  
 438  
 439  
 440  
 441  
 442  
 443  
 444  
 445  
 446  
 447  
 448  
 449  
 450  
 451  
 452  
 453  
 454  
 455  
 456  
 457  
 458  
 459  
 460  
 461  
 462  
 463  
 464  
 465  
 466  
 467  
 468  
 469  
 470  
 471  
 472

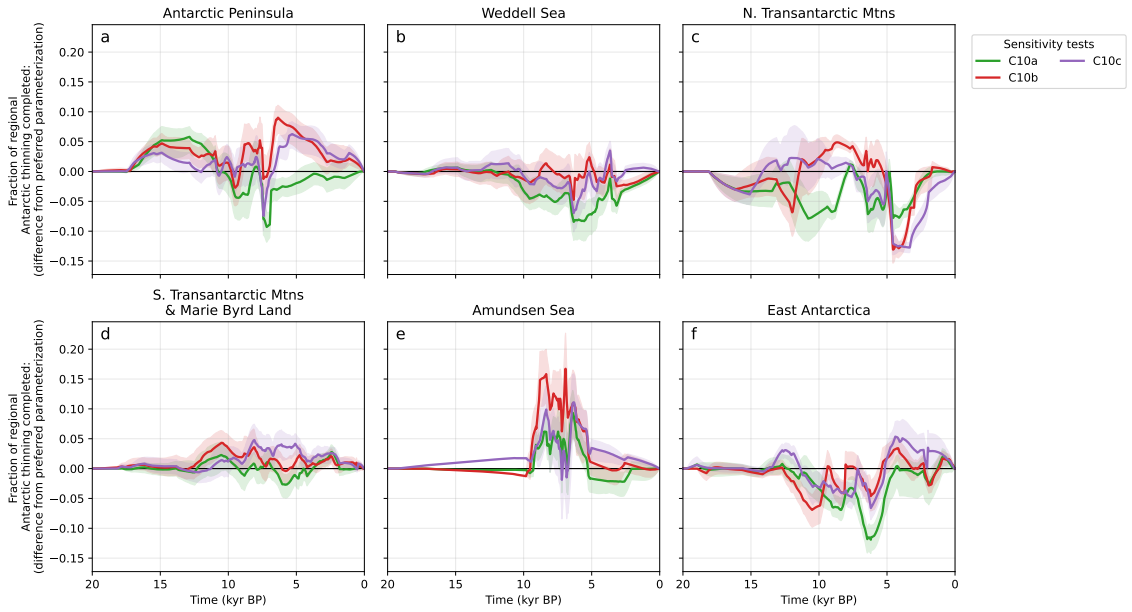

**Fig. S13 Tests demonstrating sensitivity of PATR to model parameters.** Colored lines and envelopes indicate difference in fractional Antarctic Ice Sheet thinning completed for each Antarctic region between the preferred parameterization and sensitivity tests C10a, C10b, and C10c (see Methods).

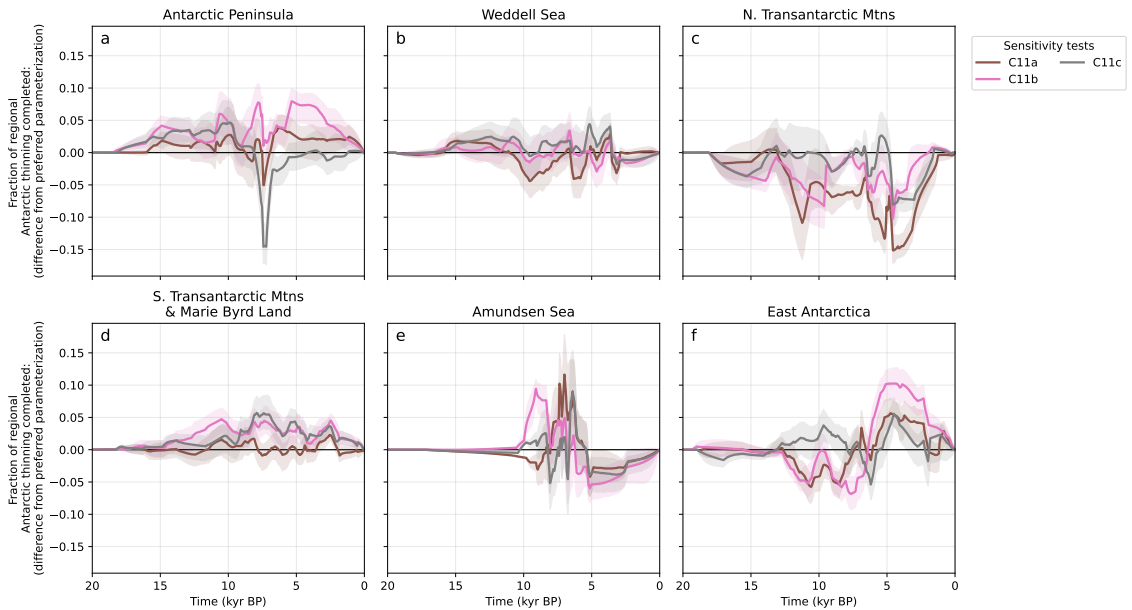

**Fig. S14 Tests demonstrating sensitivity of PATR to model parameters.** Colored lines and envelopes indicate difference in fractional Antarctic Ice Sheet thinning completed for each Antarctic region between the preferred parameterization and sensitivity tests C11a, C11b, and C11c (see Methods).

#### 4 Site-by-site comparison of PATR to data

473  
 474  
 475  
 476  
 477  
 478  
 479  
 480  
 481  
 482  
 483  
 484  
 485  
 486  
 487  
 488  
 489  
 490  
 491  
 492  
 493  
 494  
 495  
 496  
 497  
 498  
 499  
 500  
 501  
 502  
 503  
 504  
 505  
 506  
 507  
 508  
 509  
 510  
 511  
 512  
 513  
 514  
 515  
 516  
 517  
 518  
 519  
 520  
 521  
 522  
 523  
 524  
 525  
 526  
 527  
 528  
 529  
 530  
 531

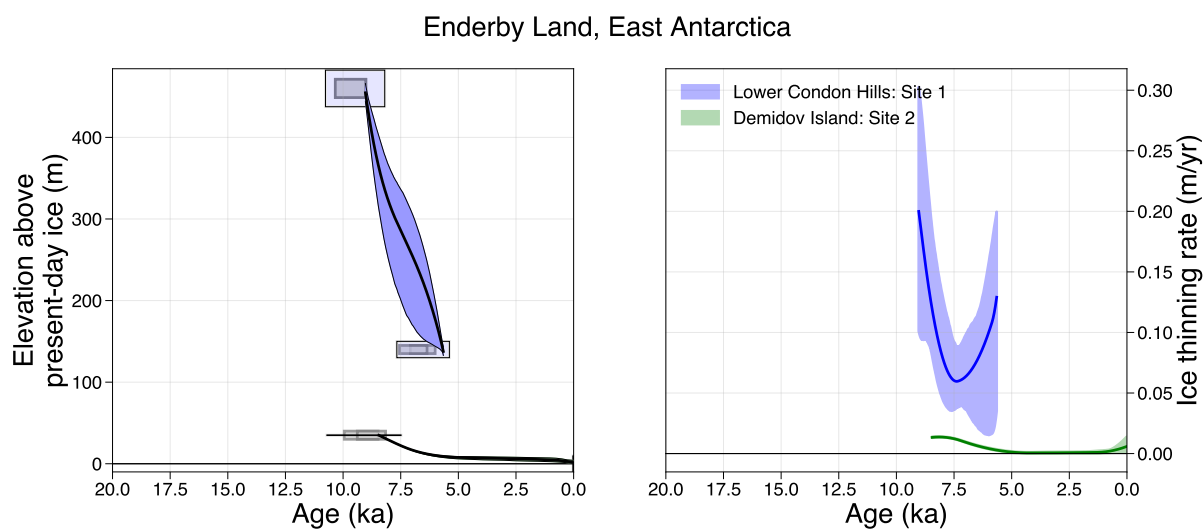

**Fig. S15** Thinning histories from Enderby Land East Antarctica. Colored boxes mark cosmogenic nuclide exposure age data and/or radiocarbon-dated lakes. Gray boxes mark rejected data. Colored envelopes denote PATR median and 95% credible intervals for local Antarctic Ice Sheet elevation (left panel) and rate of thinning (right panel).

532  
 533  
 534  
 535  
 536  
 537  
 538  
 539  
 540  
 541  
 542  
 543  
 544  
 545  
 546  
 547  
 548  
 549  
 550  
 551  
 552  
 553  
 554  
 555  
 556  
 557  
 558  
 559  
 560  
 561  
 562  
 563  
 564  
 565  
 566  
 567  
 568  
 569  
 570  
 571  
 572  
 573  
 574  
 575  
 576  
 577  
 578  
 579  
 580  
 581  
 582  
 583  
 584  
 585  
 586  
 587  
 588  
 589  
 590

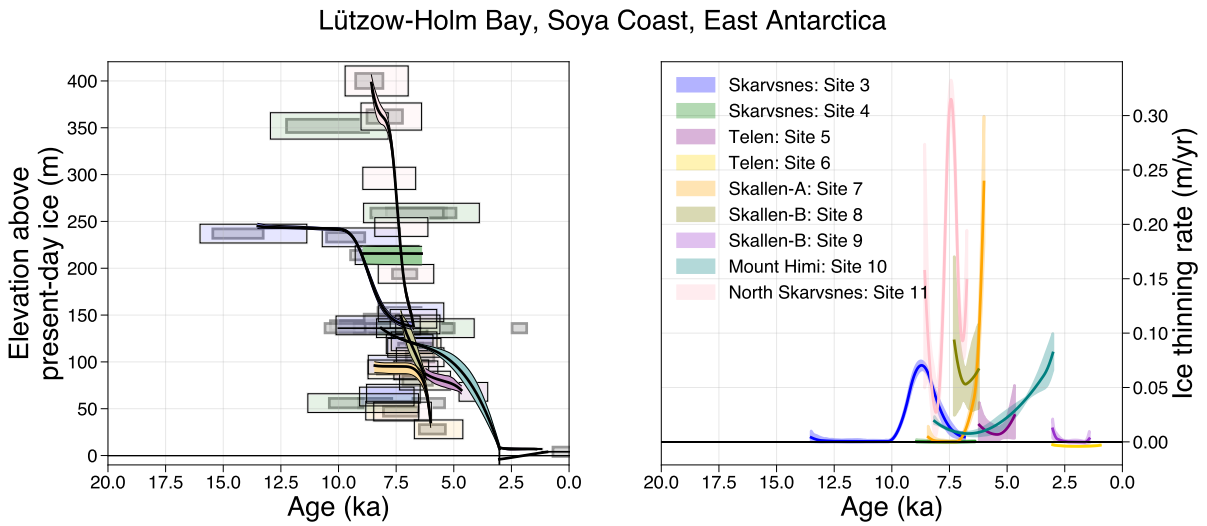

**Fig. S16** Thinning histories from Lützow-Holm Bay Soya Coast East Antarctica. Colored boxes mark cosmogenic nuclide exposure age data and/or radiocarbon-dated lakes. Gray boxes mark rejected data. Colored envelopes denote PATR median and 95% credible intervals for local Antarctic Ice Sheet elevation (left panel) and rate of thinning (right panel).

591  
592  
593  
594  
595  
596  
597  
598  
599  
600  
601  
602  
603  
604  
605  
606  
607  
608  
609  
610  
611  
612  
613  
614  
615  
616  
617  
618  
619  
620  
621  
622  
623  
624  
625  
626  
627  
628  
629  
630  
631  
632  
633  
634  
635  
636  
637  
638  
639  
640  
641  
642  
643  
644  
645  
646  
647  
648  
649

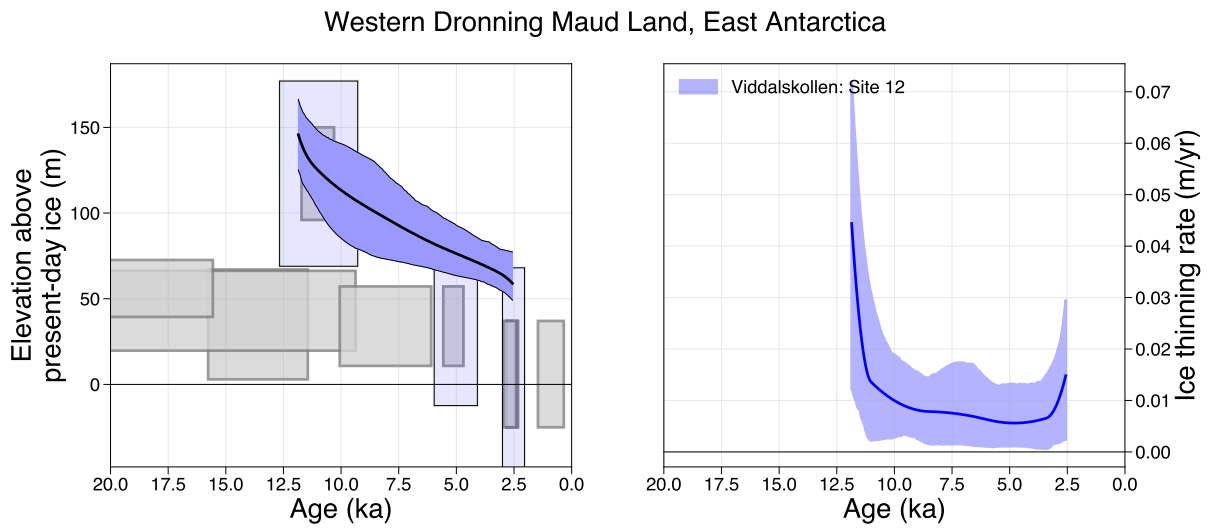

**Fig. S17** Thinning histories from Western Dronning Maud Land East Antarctica. Colored boxes mark cosmogenic nuclide exposure age data and/or radiocarbon-dated lakes. Gray boxes mark rejected data. Colored envelopes denote PATR median and 95% credible intervals for local Antarctic Ice Sheet elevation (left panel) and rate of thinning (right panel).

650  
651  
652  
653  
654  
655  
656  
657  
658  
659  
660  
661  
662  
663  
664  
665  
666  
667  
668  
669  
670  
671  
672  
673  
674  
675  
676  
677  
678  
679  
680  
681  
682  
683  
684  
685  
686  
687  
688  
689  
690  
691  
692  
693  
694  
695  
696  
697  
698  
699  
700  
701  
702  
703  
704  
705  
706  
707  
708

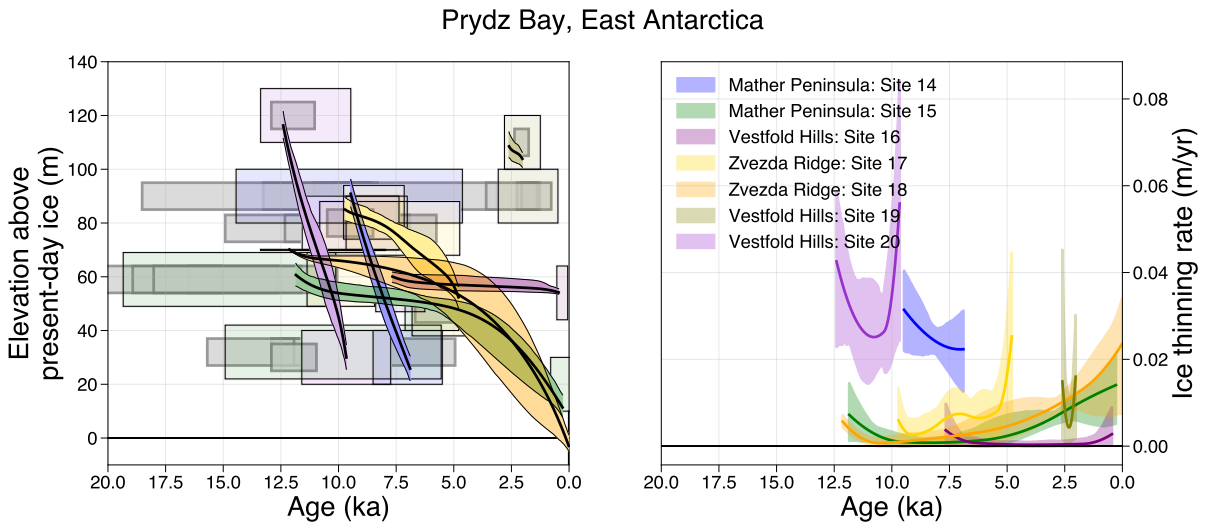

**Fig. S18** Thinning histories from Prydz Bay East Antarctica. Colored boxes mark cosmogenic nuclide exposure age data and/or radiocarbon-dated lakes. Gray boxes mark rejected data. Colored envelopes denote PATR median and 95% credible intervals for local Antarctic Ice Sheet elevation (left panel) and rate of thinning (right panel).

709  
710  
711  
712  
713  
714  
715  
716  
717  
718  
719  
720  
721  
722  
723  
724  
725  
726  
727  
728  
729  
730  
731  
732  
733  
734  
735  
736  
737  
738  
739  
740  
741  
742  
743  
744  
745  
746  
747  
748  
749  
750  
751  
752  
753  
754  
755  
756  
757  
758  
759  
760  
761  
762  
763  
764  
765  
766  
767

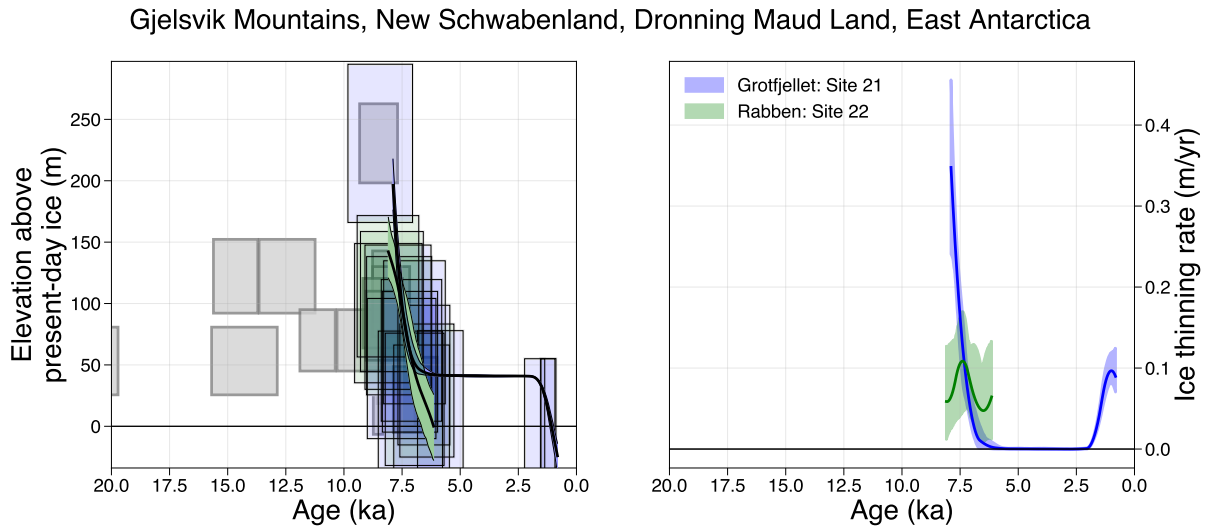

**Fig. S19** Thinning histories from Gjelsvik Mountains, new Schwabenland, Dronning Maud Land, East Antarctica. Colored boxes mark cosmogenic nuclide exposure age data and/or radiocarbon-dated lakes. Gray boxes mark rejected data. Colored envelopes denote PATR median and 95% credible intervals for local Antarctic Ice Sheet elevation (left panel) and rate of thinning (right panel).

768  
 769  
 770  
 771  
 772  
 773  
 774  
 775  
 776  
 777  
 778  
 779  
 780  
 781  
 782  
 783  
 784  
 785  
 786  
 787  
 788  
 789  
 790  
 791  
 792  
 793  
 794  
 795  
 796  
 797  
 798  
 799  
 800  
 801  
 802  
 803  
 804  
 805  
 806  
 807  
 808  
 809  
 810  
 811  
 812  
 813  
 814  
 815  
 816  
 817  
 818  
 819  
 820  
 821  
 822  
 823  
 824  
 825  
 826

Central Masson Range, Mac. Robertson Land, East Antarctica

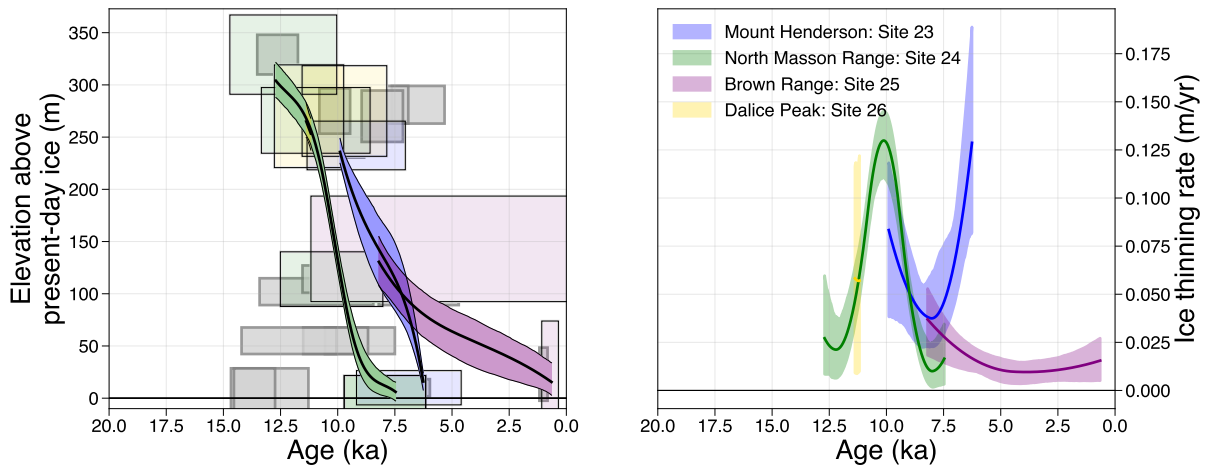

**Fig. S20** Thinning histories from Central Masson Range Mac. Robertson Land East Antarctica. Colored boxes mark cosmogenic nuclide exposure age data and/or radiocarbon-dated lakes. Gray boxes mark rejected data. Colored envelopes denote PATR median and 95% credible intervals for local Antarctic Ice Sheet elevation (left panel) and rate of thinning (right panel).

827  
828  
829  
830  
831  
832  
833  
834  
835  
836  
837  
838  
839  
840  
841  
842  
843  
844  
845  
846  
847  
848  
849  
850  
851  
852  
853  
854  
855  
856  
857  
858  
859  
860  
861  
862  
863  
864  
865  
866  
867  
868  
869  
870  
871  
872  
873  
874  
875  
876  
877  
878  
879  
880  
881  
882  
883  
884  
885

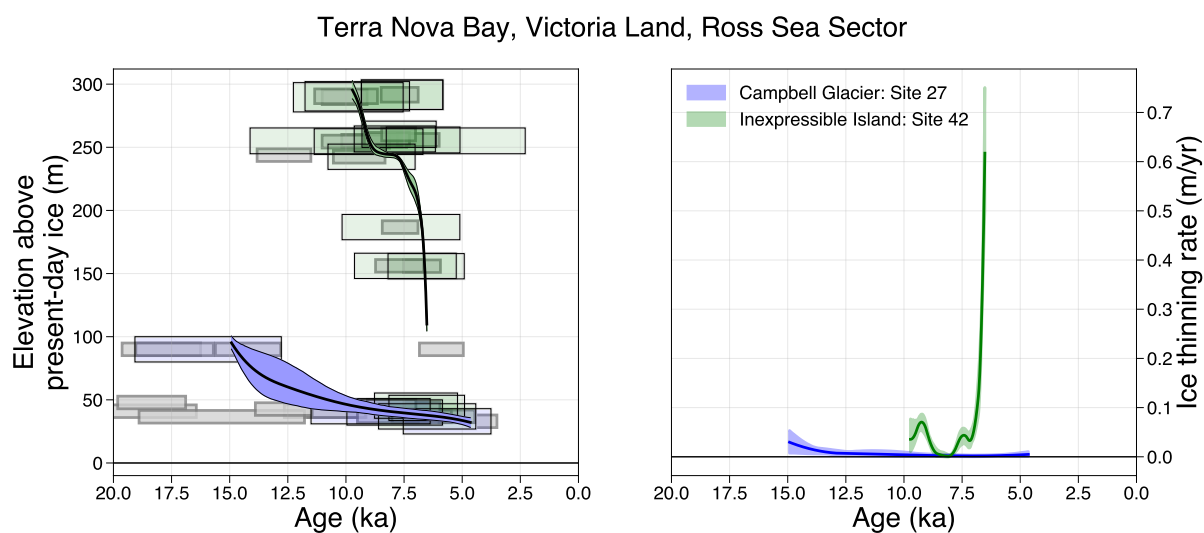

**Fig. S21** Thinning histories from Terra Nova Bay Victoria Land Ross Sea Sector. Colored boxes mark cosmogenic nuclide exposure age data and/or radiocarbon-dated lakes. Gray boxes mark rejected data. Colored envelopes denote PATR median and 95% credible intervals for local Antarctic Ice Sheet elevation (left panel) and rate of thinning (right panel).

886  
887  
888  
889  
890  
891  
892  
893  
894  
895  
896  
897  
898  
899  
900  
901  
902  
903  
904  
905  
906  
907  
908  
909  
910  
911  
912  
913  
914  
915  
916  
917  
918  
919  
920  
921  
922  
923  
924  
925  
926  
927  
928  
929  
930  
931  
932  
933  
934  
935  
936  
937  
938  
939  
940  
941  
942  
943  
944

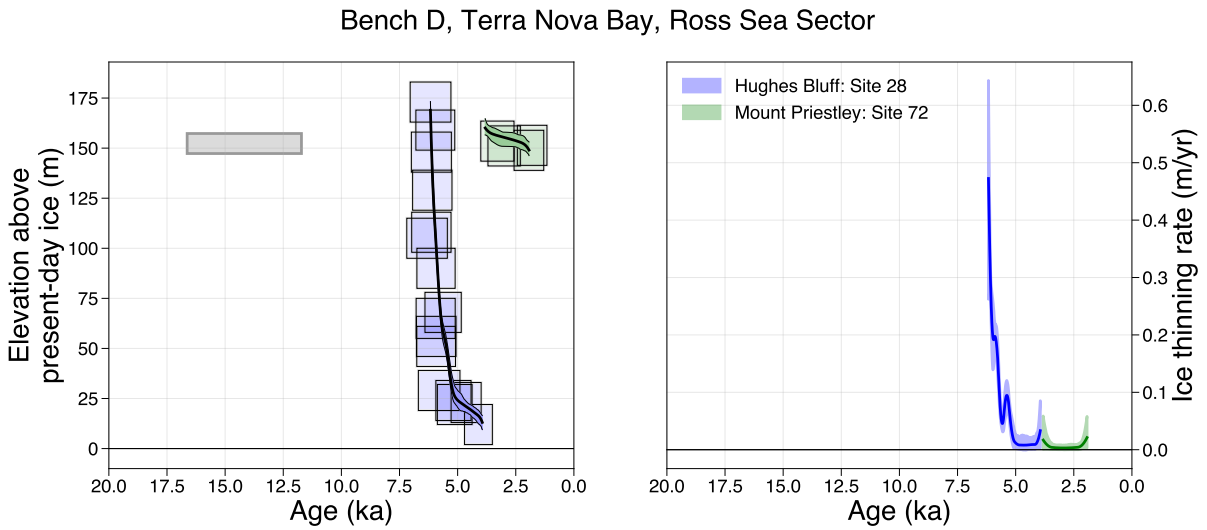

**Fig. S22** Thinning histories from Bench D Terra Nova Bay Ross Sea Sector. Colored boxes mark cosmogenic nuclide exposure age data and/or radiocarbon-dated lakes. Gray boxes mark rejected data. Colored envelopes denote PATR median and 95% credible intervals for local Antarctic Ice Sheet elevation (left panel) and rate of thinning (right panel).

945  
946  
947  
948  
949  
950  
951  
952  
953  
954  
955  
956  
957  
958  
959  
960  
961  
962  
963  
964  
965  
966  
967  
968  
969  
970  
971  
972  
973  
974  
975  
976  
977  
978  
979  
980  
981  
982  
983  
984  
985  
986  
987  
988  
989  
990  
991  
992  
993  
994  
995  
996  
997  
998  
999  
1000  
1001  
1002  
1003

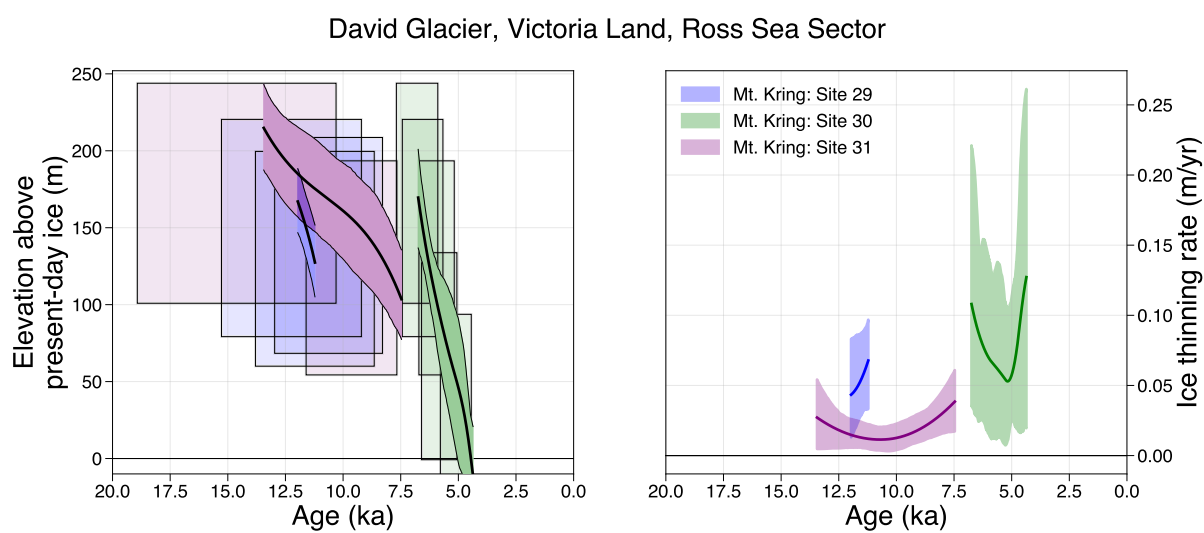

**Fig. S23** Thinning histories from David Glacier Victoria Land Ross Sea Sector. Colored boxes mark cosmogenic nuclide exposure age data and/or radiocarbon-dated lakes. Gray boxes mark rejected data. Colored envelopes denote PATR median and 95% credible intervals for local Antarctic Ice Sheet elevation (left panel) and rate of thinning (right panel).

1004  
1005  
1006  
1007  
1008  
1009  
1010  
1011  
1012  
1013  
1014  
1015  
1016  
1017  
1018  
1019  
1020  
1021  
1022  
1023  
1024  
1025  
1026  
1027  
1028  
1029  
1030  
1031  
1032  
1033  
1034  
1035  
1036  
1037  
1038  
1039  
1040  
1041  
1042  
1043  
1044  
1045  
1046  
1047  
1048  
1049  
1050  
1051  
1052  
1053  
1054  
1055  
1056  
1057  
1058  
1059  
1060  
1061  
1062

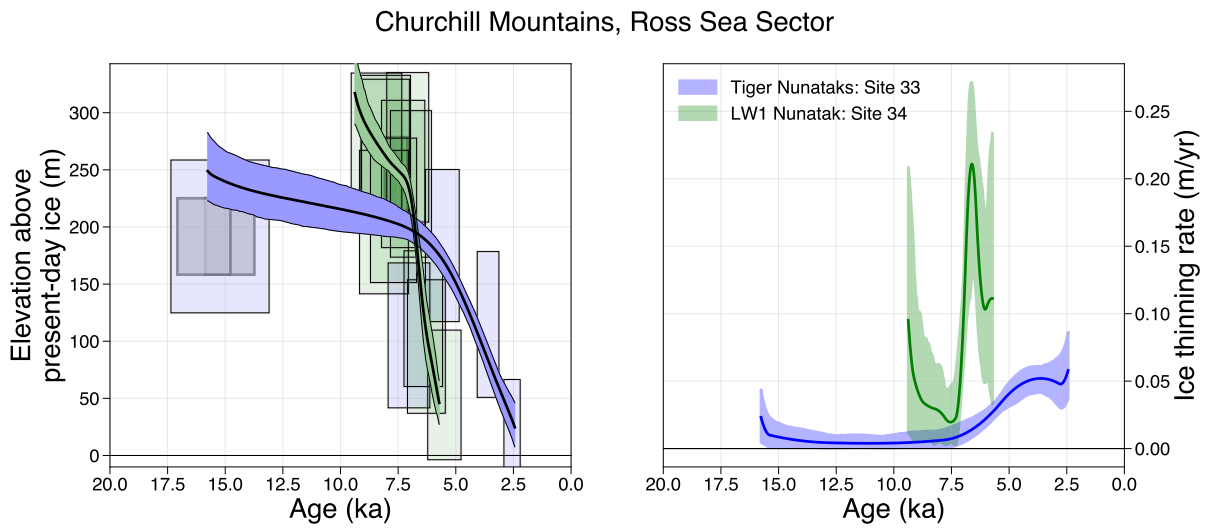

**Fig. S24** Thinning histories from Churchill Mountains Ross Sea Sector. Colored boxes mark cosmogenic nuclide exposure age data and/or radiocarbon-dated lakes. Gray boxes mark rejected data. Colored envelopes denote PATR median and 95% credible intervals for local Antarctic Ice Sheet elevation (left panel) and rate of thinning (right panel).

1063  
1064  
1065  
1066  
1067  
1068  
1069  
1070  
1071  
1072  
1073  
1074  
1075  
1076  
1077  
1078  
1079  
1080  
1081  
1082  
1083  
1084  
1085  
1086  
1087  
1088  
1089  
1090  
1091  
1092  
1093  
1094  
1095  
1096  
1097  
1098  
1099  
1100  
1101  
1102  
1103  
1104  
1105  
1106  
1107  
1108  
1109  
1110  
1111  
1112  
1113  
1114  
1115  
1116  
1117  
1118  
1119  
1120  
1121

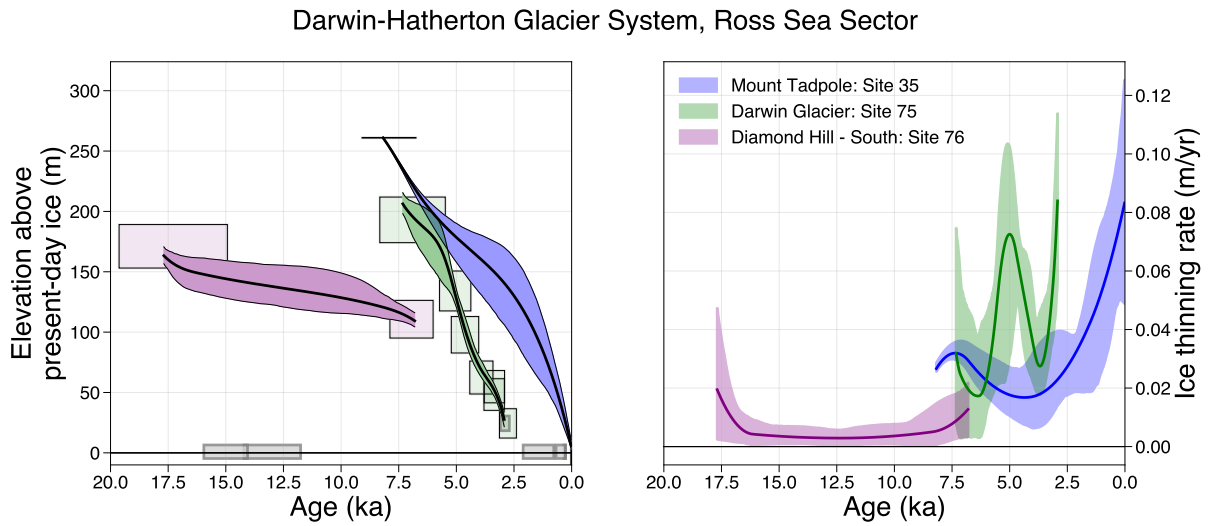

**Fig. S25** Thinning histories from Darwin-Hatherton Glacier System Ross Sea Sector. Colored boxes mark cosmogenic nuclide exposure age data and/or radiocarbon-dated lakes. Gray boxes mark rejected data. Colored envelopes denote PATR median and 95% credible intervals for local Antarctic Ice Sheet elevation (left panel) and rate of thinning (right panel).

1122  
1123  
1124  
1125  
1126  
1127  
1128  
1129  
1130  
1131  
1132  
1133  
1134  
1135  
1136  
1137  
1138  
1139  
1140  
1141  
1142  
1143  
1144  
1145  
1146  
1147  
1148  
1149  
1150  
1151  
1152  
1153  
1154  
1155  
1156  
1157  
1158  
1159  
1160  
1161  
1162  
1163  
1164  
1165  
1166  
1167  
1168  
1169  
1170  
1171  
1172  
1173  
1174  
1175  
1176  
1177  
1178  
1179  
1180

### Royal Society Range, Ross Sea Sector

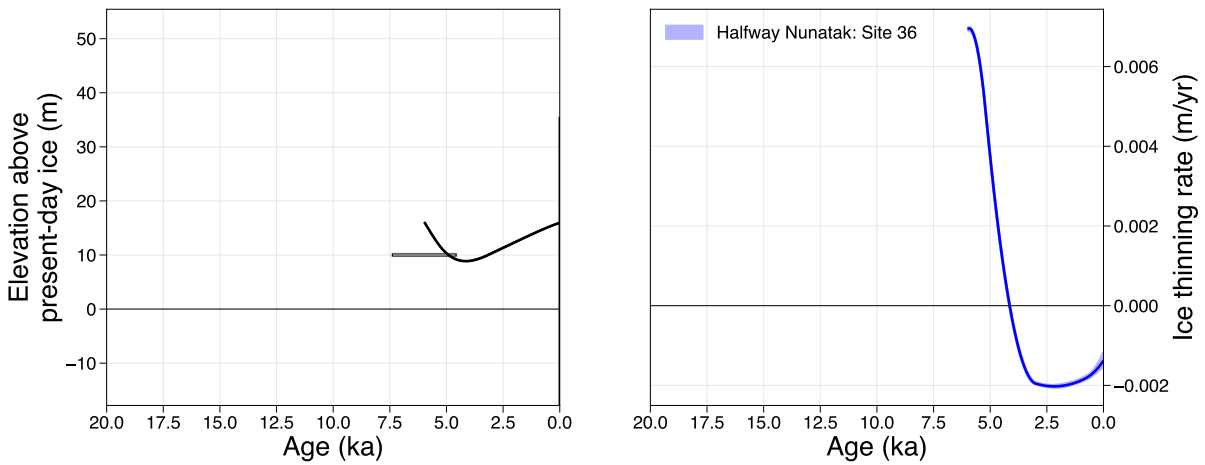

**Fig. S26** Thinning histories from Royal Society Range Ross Sea Sector. Colored boxes mark cosmogenic nuclide exposure age data and/or radiocarbon-dated lakes. Gray boxes mark rejected data. Colored envelopes denote PATR median and 95% credible intervals for local Antarctic Ice Sheet elevation (left panel) and rate of thinning (right panel).

1181  
 1182  
 1183  
 1184  
 1185  
 1186  
 1187  
 1188  
 1189  
 1190  
 1191  
 1192  
 1193  
 1194  
 1195  
 1196  
 1197  
 1198  
 1199  
 1200  
 1201  
 1202  
 1203  
 1204  
 1205  
 1206  
 1207  
 1208  
 1209  
 1210  
 1211  
 1212  
 1213  
 1214  
 1215  
 1216  
 1217  
 1218  
 1219  
 1220  
 1221  
 1222  
 1223  
 1224  
 1225  
 1226  
 1227  
 1228  
 1229  
 1230  
 1231  
 1232  
 1233  
 1234  
 1235  
 1236  
 1237  
 1238  
 1239

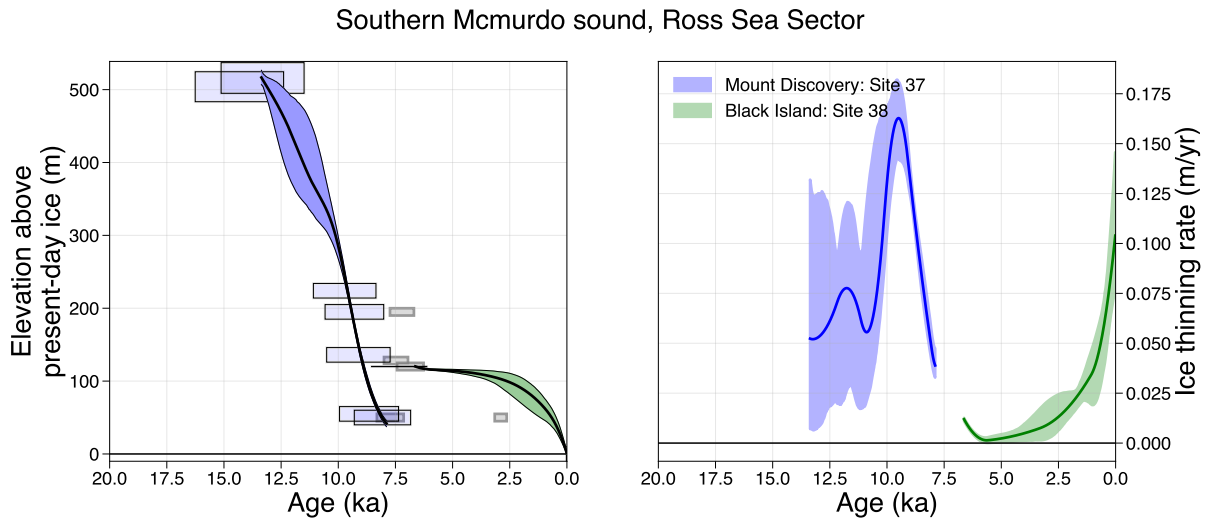

**Fig. S27** Thinning histories from Southern McMurdo Sound Ross Sea Sector. Colored boxes mark cosmogenic nuclide exposure age data and/or radiocarbon-dated lakes. Gray boxes mark rejected data. Colored envelopes denote PATR median and 95% credible intervals for local Antarctic Ice Sheet elevation (left panel) and rate of thinning (right panel).

1240  
 1241  
 1242  
 1243  
 1244  
 1245  
 1246  
 1247  
 1248  
 1249  
 1250  
 1251  
 1252  
 1253  
 1254  
 1255  
 1256  
 1257  
 1258  
 1259  
 1260  
 1261  
 1262  
 1263  
 1264  
 1265  
 1266  
 1267  
 1268  
 1269  
 1270  
 1271  
 1272  
 1273  
 1274  
 1275  
 1276  
 1277  
 1278  
 1279  
 1280  
 1281  
 1282  
 1283  
 1284  
 1285  
 1286  
 1287  
 1288  
 1289  
 1290  
 1291  
 1292  
 1293  
 1294  
 1295  
 1296  
 1297  
 1298

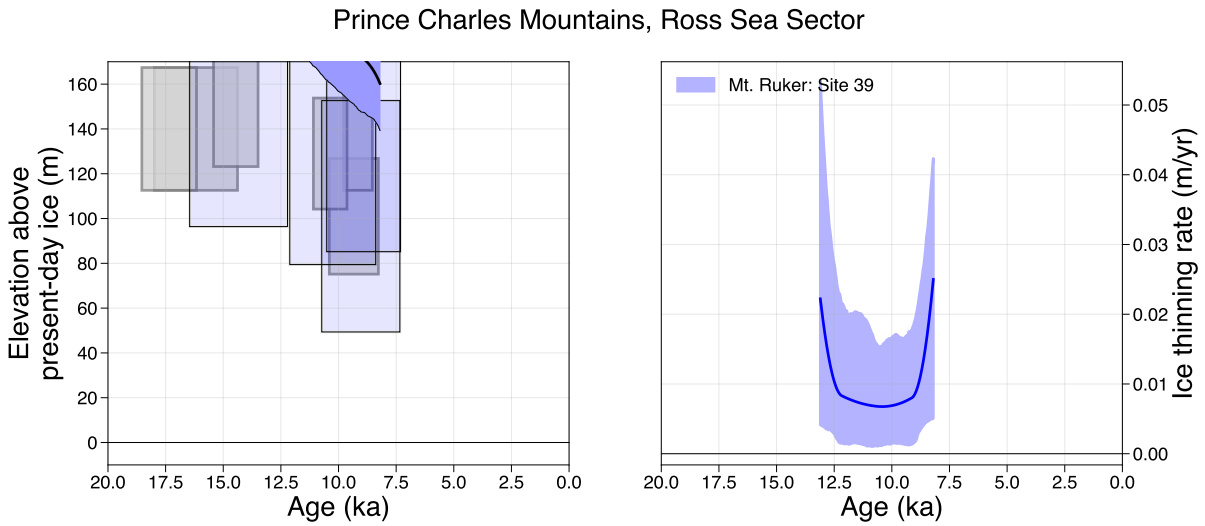

**Fig. S28** Thinning histories from Prince Charles Mountains Ross Sea Sector. Colored boxes mark cosmogenic nuclide exposure age data and/or radiocarbon-dated lakes. Gray boxes mark rejected data. Colored envelopes denote PATR median and 95% credible intervals for local Antarctic Ice Sheet elevation (left panel) and rate of thinning (right panel).

1299  
 1300  
 1301  
 1302  
 1303  
 1304  
 1305  
 1306  
 1307  
 1308  
 1309  
 1310  
 1311  
 1312  
 1313  
 1314  
 1315  
 1316  
 1317  
 1318  
 1319  
 1320  
 1321  
 1322  
 1323  
 1324  
 1325  
 1326  
 1327  
 1328  
 1329  
 1330  
 1331  
 1332  
 1333  
 1334  
 1335  
 1336  
 1337  
 1338  
 1339  
 1340  
 1341  
 1342  
 1343  
 1344  
 1345  
 1346  
 1347  
 1348  
 1349  
 1350  
 1351  
 1352  
 1353  
 1354  
 1355  
 1356  
 1357

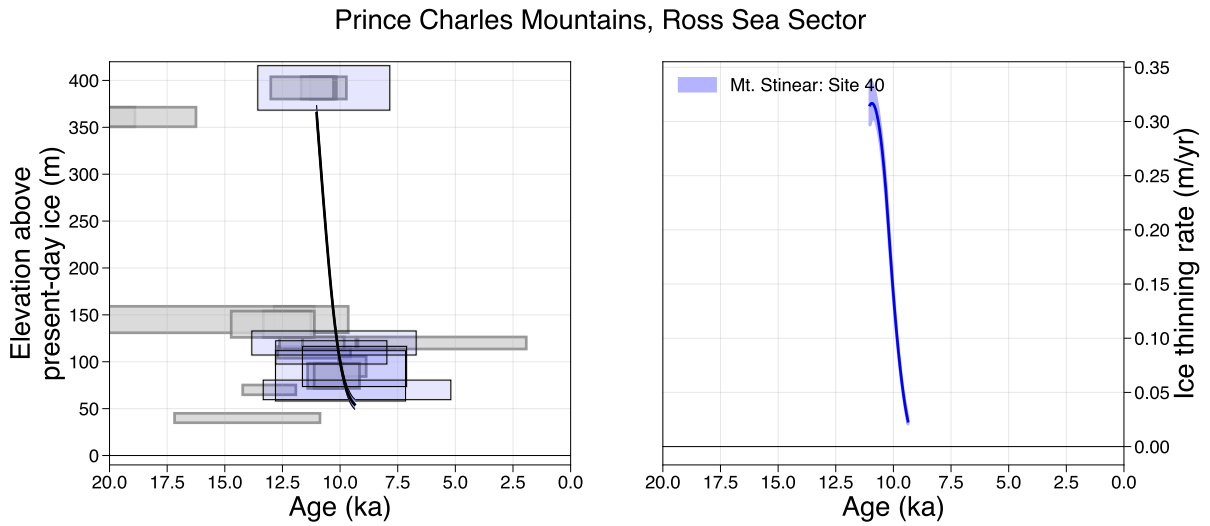

**Fig. S29** Thinning histories from Prince Charles Mountains Ross Sea Sector. Colored boxes mark cosmogenic nuclide exposure age data and/or radiocarbon-dated lakes. Gray boxes mark rejected data. Colored envelopes denote PATR median and 95% credible intervals for local Antarctic Ice Sheet elevation (left panel) and rate of thinning (right panel).

1358  
 1359  
 1360  
 1361  
 1362  
 1363  
 1364  
 1365  
 1366  
 1367  
 1368  
 1369  
 1370  
 1371  
 1372  
 1373  
 1374  
 1375  
 1376  
 1377  
 1378  
 1379  
 1380  
 1381  
 1382  
 1383  
 1384  
 1385  
 1386  
 1387  
 1388  
 1389  
 1390  
 1391  
 1392  
 1393  
 1394  
 1395  
 1396  
 1397  
 1398  
 1399  
 1400  
 1401  
 1402  
 1403  
 1404  
 1405  
 1406  
 1407  
 1408  
 1409  
 1410  
 1411  
 1412  
 1413  
 1414  
 1415  
 1416

Ridge F, Southern Cross Mountains, Terra Nova Bay, Ross Sea Sector

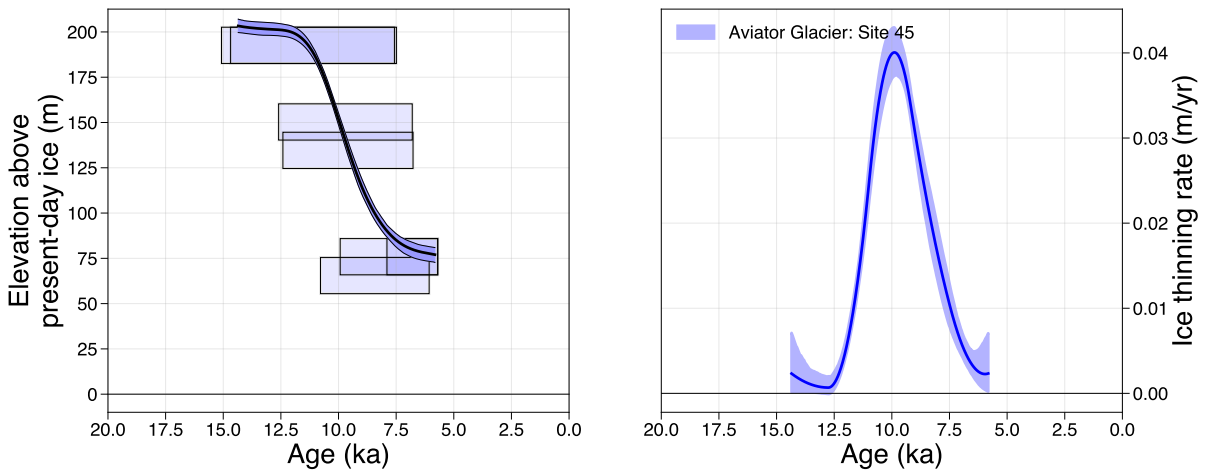

**Fig. S30** Thinning histories from Ridge F Southern Cross Mountains Terra Nova Bay Ross Sea Sector. Colored boxes mark cosmogenic nuclide exposure age data and/or radiocarbon-dated lakes. Gray boxes mark rejected data. Colored envelopes denote PATR median and 95% credible intervals for local Antarctic Ice Sheet elevation (left panel) and rate of thinning (right panel).

1417  
 1418  
 1419  
 1420  
 1421  
 1422  
 1423  
 1424  
 1425  
 1426  
 1427  
 1428  
 1429  
 1430  
 1431  
 1432  
 1433  
 1434  
 1435  
 1436  
 1437  
 1438  
 1439  
 1440  
 1441  
 1442  
 1443  
 1444  
 1445  
 1446  
 1447  
 1448  
 1449  
 1450  
 1451  
 1452  
 1453  
 1454  
 1455  
 1456  
 1457  
 1458  
 1459  
 1460  
 1461  
 1462  
 1463  
 1464  
 1465  
 1466  
 1467  
 1468  
 1469  
 1470  
 1471  
 1472  
 1473  
 1474  
 1475

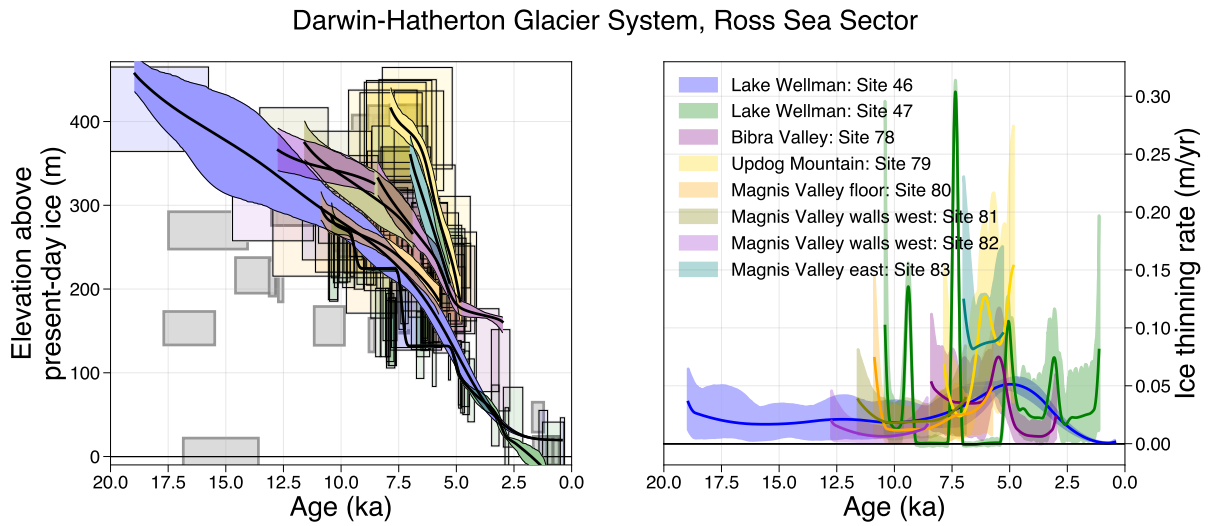

**Fig. S31** Thinning histories from Darwin-Hatherton Glacier System Ross Sea Sector. Colored boxes mark cosmogenic nuclide exposure age data and/or radiocarbon-dated lakes. Gray boxes mark rejected data. Colored envelopes denote PATR median and 95% credible intervals for local Antarctic Ice Sheet elevation (left panel) and rate of thinning (right panel).

1476  
 1477  
 1478  
 1479  
 1480  
 1481  
 1482  
 1483  
 1484  
 1485  
 1486  
 1487  
 1488  
 1489  
 1490  
 1491  
 1492  
 1493  
 1494  
 1495  
 1496  
 1497  
 1498  
 1499  
 1500  
 1501  
 1502  
 1503  
 1504  
 1505  
 1506  
 1507  
 1508  
 1509  
 1510  
 1511  
 1512  
 1513  
 1514  
 1515  
 1516  
 1517  
 1518  
 1519  
 1520  
 1521  
 1522  
 1523  
 1524  
 1525  
 1526  
 1527  
 1528  
 1529  
 1530  
 1531  
 1532  
 1533  
 1534

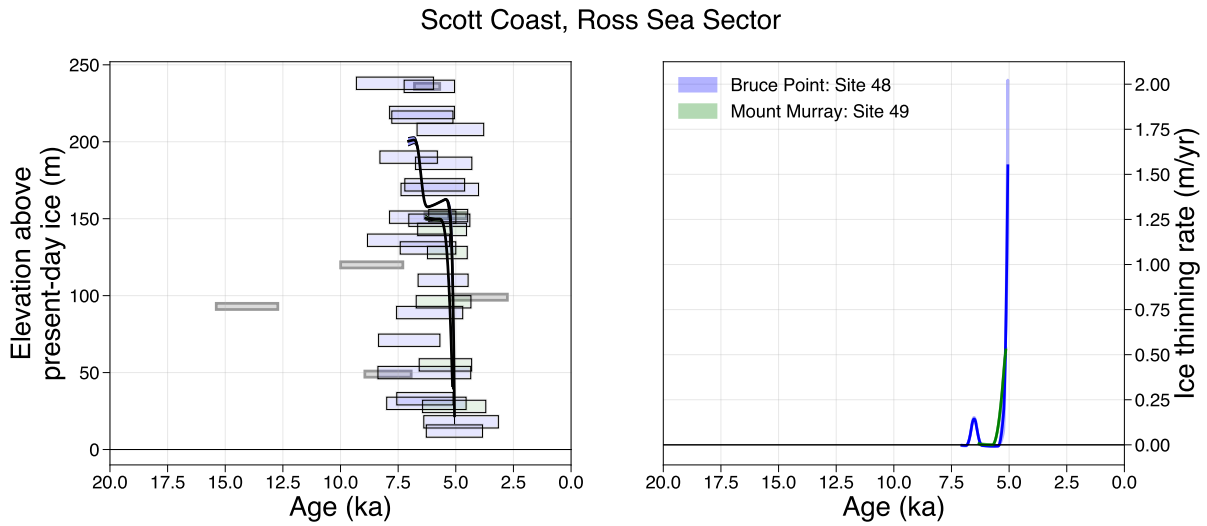

**Fig. S32** Thinning histories from Scott Coast Ross Sea Sector. Colored boxes mark cosmogenic nuclide exposure age data and/or radiocarbon-dated lakes. Gray boxes mark rejected data. Colored envelopes denote PATR median and 95% credible intervals for local Antarctic Ice Sheet elevation (left panel) and rate of thinning (right panel).

1535  
1536  
1537  
1538  
1539  
1540  
1541  
1542  
1543  
1544  
1545  
1546  
1547  
1548  
1549  
1550  
1551  
1552  
1553  
1554  
1555  
1556  
1557  
1558  
1559  
1560  
1561  
1562  
1563  
1564  
1565  
1566  
1567  
1568  
1569  
1570  
1571  
1572  
1573  
1574  
1575  
1576  
1577  
1578  
1579  
1580  
1581  
1582  
1583  
1584  
1585  
1586  
1587  
1588  
1589  
1590  
1591  
1592  
1593

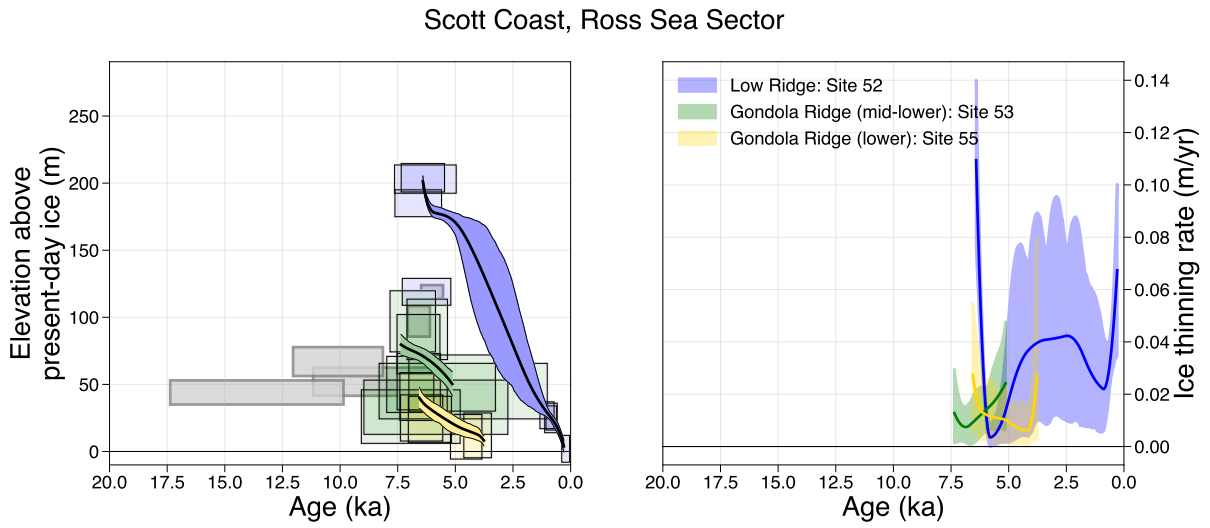

**Fig. S33** Thinning histories from Scott Coast Ross Sea Sector. Colored boxes mark cosmogenic nuclide exposure age data and/or radiocarbon-dated lakes. Gray boxes mark rejected data. Colored envelopes denote PATR median and 95% credible intervals for local Antarctic Ice Sheet elevation (left panel) and rate of thinning (right panel).

1594  
 1595  
 1596  
 1597  
 1598  
 1599  
 1600  
 1601  
 1602  
 1603  
 1604  
 1605  
 1606  
 1607  
 1608  
 1609  
 1610  
 1611  
 1612  
 1613  
 1614  
 1615  
 1616  
 1617  
 1618  
 1619  
 1620  
 1621  
 1622  
 1623  
 1624  
 1625  
 1626  
 1627  
 1628  
 1629  
 1630  
 1631  
 1632  
 1633  
 1634  
 1635  
 1636  
 1637  
 1638  
 1639  
 1640  
 1641  
 1642  
 1643  
 1644  
 1645  
 1646  
 1647  
 1648  
 1649  
 1650  
 1651  
 1652

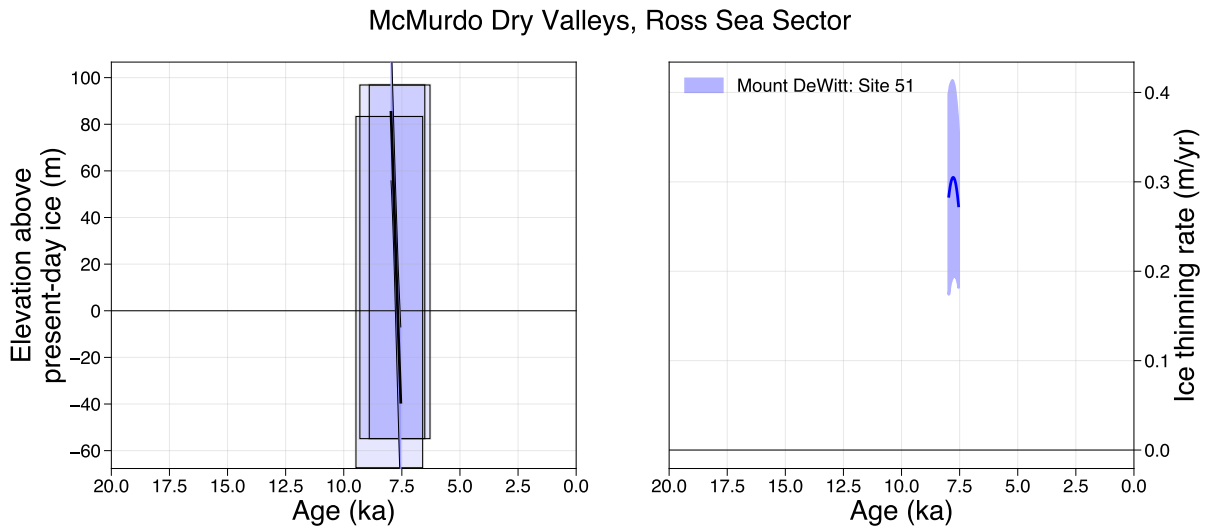

**Fig. S34** Thinning histories from McMurdo Dry Valleys Ross Sea Sector. Colored boxes mark cosmogenic nuclide exposure age data and/or radiocarbon-dated lakes. Gray boxes mark rejected data. Colored envelopes denote PATR median and 95% credible intervals for local Antarctic Ice Sheet elevation (left panel) and rate of thinning (right panel).

1653  
 1654  
 1655  
 1656  
 1657  
 1658  
 1659  
 1660  
 1661  
 1662  
 1663  
 1664  
 1665  
 1666  
 1667  
 1668  
 1669  
 1670  
 1671  
 1672  
 1673  
 1674  
 1675  
 1676  
 1677  
 1678  
 1679  
 1680  
 1681  
 1682  
 1683  
 1684  
 1685  
 1686  
 1687  
 1688  
 1689  
 1690  
 1691  
 1692  
 1693  
 1694  
 1695  
 1696  
 1697  
 1698  
 1699  
 1700  
 1701  
 1702  
 1703  
 1704  
 1705  
 1706  
 1707  
 1708  
 1709  
 1710  
 1711

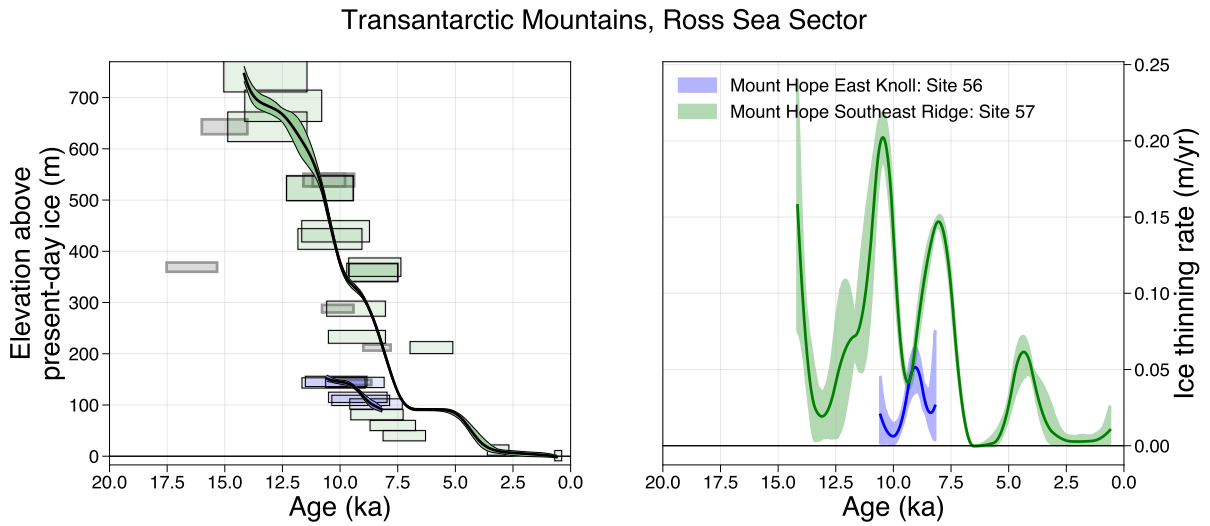

**Fig. S35** Thinning histories from Transantarctic Mountains Ross Sea Sector. Colored boxes mark cosmogenic nuclide exposure age data and/or radiocarbon-dated lakes. Gray boxes mark rejected data. Colored envelopes denote PATR median and 95% credible intervals for local Antarctic Ice Sheet elevation (left panel) and rate of thinning (right panel).

1712  
 1713  
 1714  
 1715  
 1716  
 1717  
 1718  
 1719  
 1720  
 1721  
 1722  
 1723  
 1724  
 1725  
 1726  
 1727  
 1728  
 1729  
 1730  
 1731  
 1732  
 1733  
 1734  
 1735  
 1736  
 1737  
 1738  
 1739  
 1740  
 1741  
 1742  
 1743  
 1744  
 1745  
 1746  
 1747  
 1748  
 1749  
 1750  
 1751  
 1752  
 1753  
 1754  
 1755  
 1756  
 1757  
 1758  
 1759  
 1760  
 1761  
 1762  
 1763  
 1764  
 1765  
 1766  
 1767  
 1768  
 1769  
 1770

Transantarctic Mountains, Ross Sea Sector

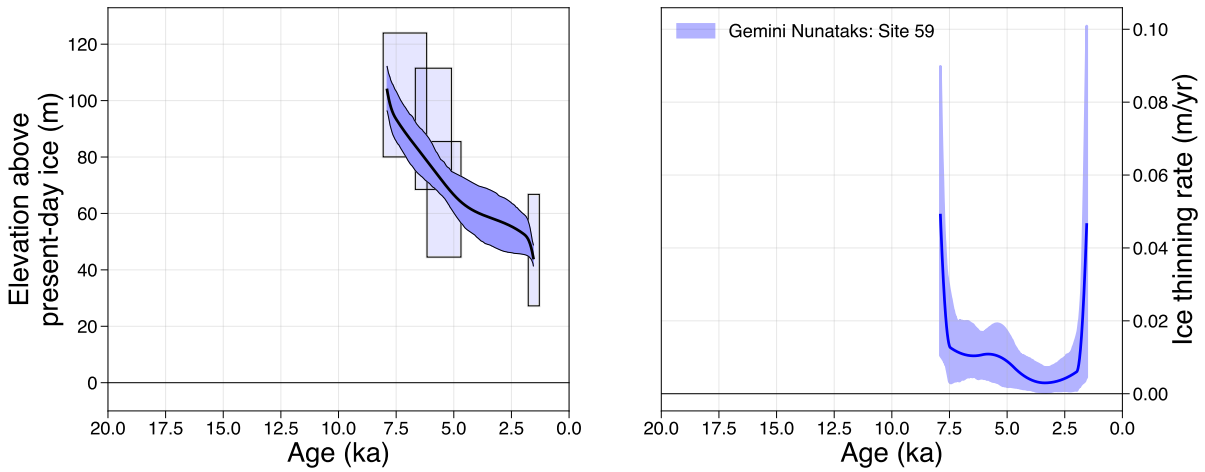

**Fig. S36** Thinning histories from Transantarctic Mountains Ross Sea Sector. Colored boxes mark cosmogenic nuclide exposure age data and/or radiocarbon-dated lakes. Gray boxes mark rejected data. Colored envelopes denote PATR median and 95% credible intervals for local Antarctic Ice Sheet elevation (left panel) and rate of thinning (right panel).

1771  
 1772  
 1773  
 1774  
 1775  
 1776  
 1777  
 1778  
 1779  
 1780  
 1781  
 1782  
 1783  
 1784  
 1785  
 1786  
 1787  
 1788  
 1789  
 1790  
 1791  
 1792  
 1793  
 1794  
 1795  
 1796  
 1797  
 1798  
 1799  
 1800  
 1801  
 1802  
 1803  
 1804  
 1805  
 1806  
 1807  
 1808  
 1809  
 1810  
 1811  
 1812  
 1813  
 1814  
 1815  
 1816  
 1817  
 1818  
 1819  
 1820  
 1821  
 1822  
 1823  
 1824  
 1825  
 1826  
 1827  
 1828  
 1829

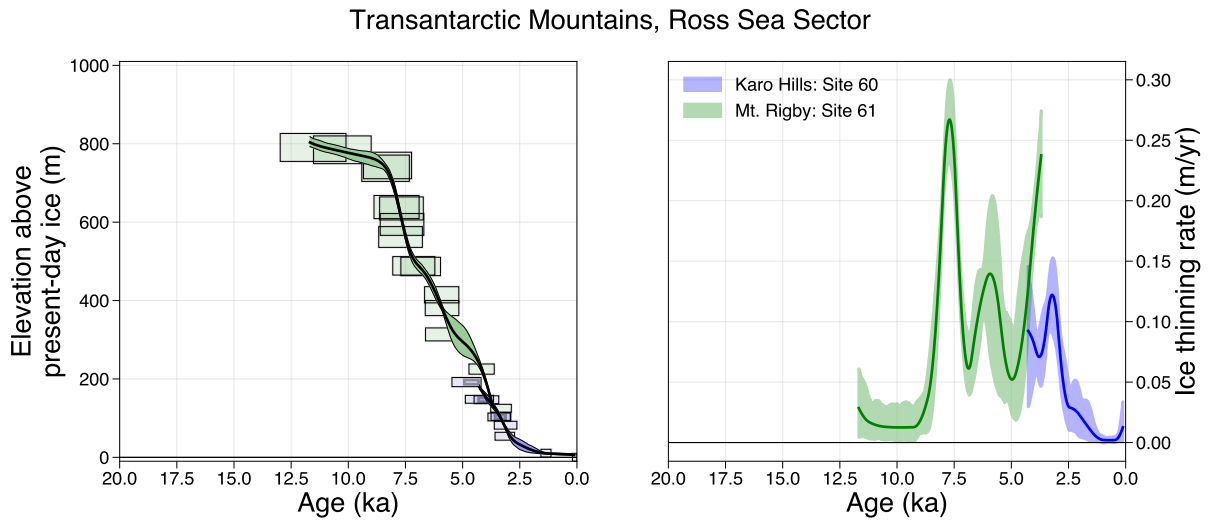

**Fig. S37** Thinning histories from Transantarctic Mountains Ross Sea Sector. Colored boxes mark cosmogenic nuclide exposure age data and/or radiocarbon-dated lakes. Gray boxes mark rejected data. Colored envelopes denote PATR median and 95% credible intervals for local Antarctic Ice Sheet elevation (left panel) and rate of thinning (right panel).

1830  
 1831  
 1832  
 1833  
 1834  
 1835  
 1836  
 1837  
 1838  
 1839  
 1840  
 1841  
 1842  
 1843  
 1844  
 1845  
 1846  
 1847  
 1848  
 1849  
 1850  
 1851  
 1852  
 1853  
 1854  
 1855  
 1856  
 1857  
 1858  
 1859  
 1860  
 1861  
 1862  
 1863  
 1864  
 1865  
 1866  
 1867  
 1868  
 1869  
 1870  
 1871  
 1872  
 1873  
 1874  
 1875  
 1876  
 1877  
 1878  
 1879  
 1880  
 1881  
 1882  
 1883  
 1884  
 1885  
 1886  
 1887  
 1888

Horlick Mountains, Ross Sea Sector

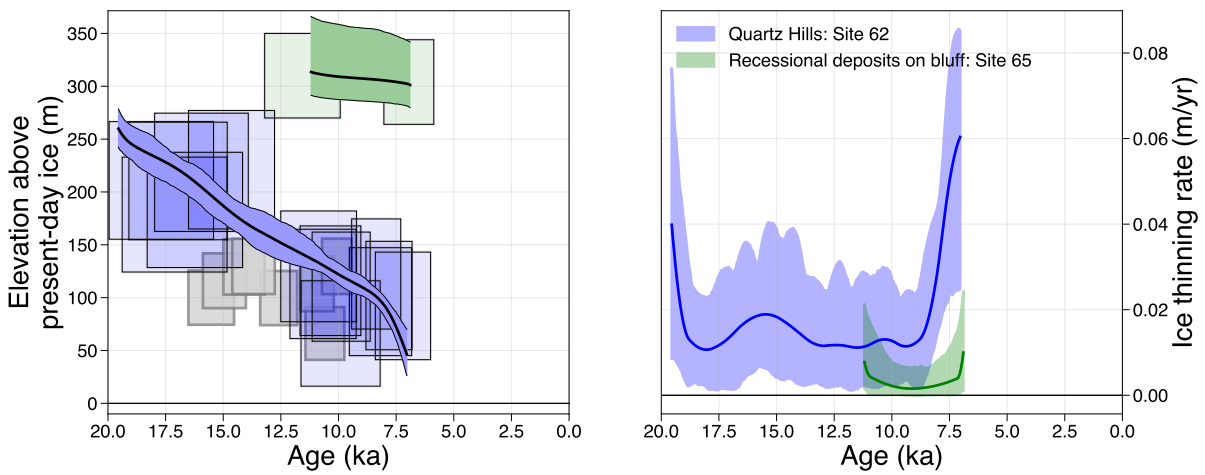

**Fig. S38** Thinning histories from Horlick Mountains Ross Sea Sector. Colored boxes mark cosmogenic nuclide exposure age data and/or radiocarbon-dated lakes. Gray boxes mark rejected data. Colored envelopes denote PATR median and 95% credible intervals for local Antarctic Ice Sheet elevation (left panel) and rate of thinning (right panel).

1889  
1890  
1891  
1892  
1893  
1894  
1895  
1896  
1897  
1898  
1899  
1900  
1901  
1902  
1903  
1904  
1905  
1906  
1907  
1908  
1909  
1910  
1911  
1912  
1913  
1914  
1915  
1916  
1917  
1918  
1919  
1920  
1921  
1922  
1923  
1924  
1925  
1926  
1927  
1928  
1929  
1930  
1931  
1932  
1933  
1934  
1935  
1936  
1937  
1938  
1939  
1940  
1941  
1942  
1943  
1944  
1945  
1946  
1947

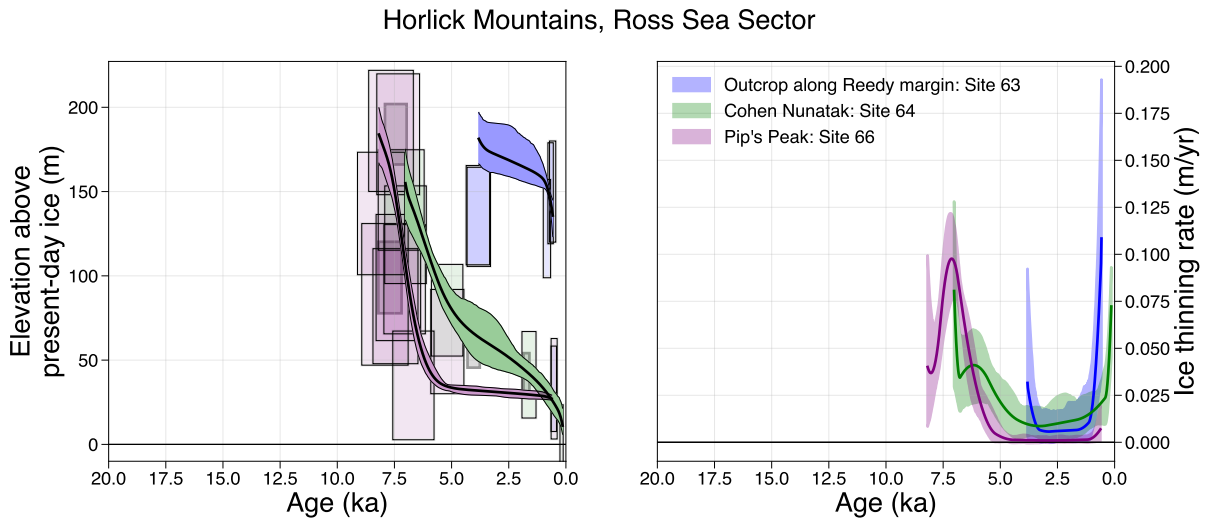

**Fig. S39** Thinning histories from Horlick Mountains Ross Sea Sector. Colored boxes mark cosmogenic nuclide exposure age data and/or radiocarbon-dated lakes. Gray boxes mark rejected data. Colored envelopes denote PATR median and 95% credible intervals for local Antarctic Ice Sheet elevation (left panel) and rate of thinning (right panel).

1948  
 1949  
 1950  
 1951  
 1952  
 1953  
 1954  
 1955  
 1956  
 1957  
 1958  
 1959  
 1960  
 1961  
 1962  
 1963  
 1964  
 1965  
 1966  
 1967  
 1968  
 1969  
 1970  
 1971  
 1972  
 1973  
 1974  
 1975  
 1976  
 1977  
 1978  
 1979  
 1980  
 1981  
 1982  
 1983  
 1984  
 1985  
 1986  
 1987  
 1988  
 1989  
 1990  
 1991  
 1992  
 1993  
 1994  
 1995  
 1996  
 1997  
 1998  
 1999  
 2000  
 2001  
 2002  
 2003  
 2004  
 2005  
 2006

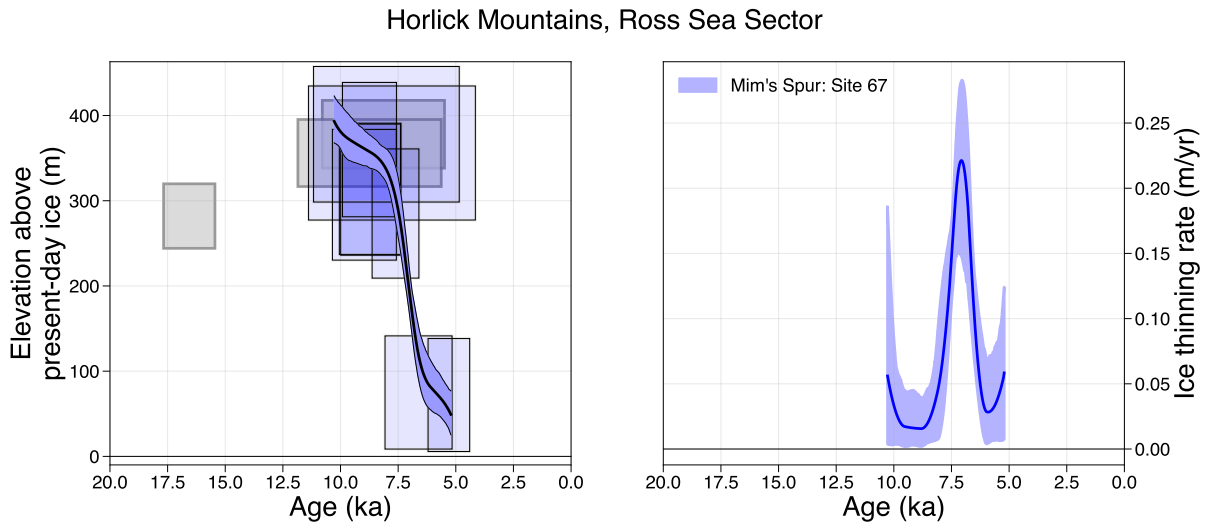

**Fig. S40** Thinning histories from Horlick Mountains Ross Sea Sector. Colored boxes mark cosmogenic nuclide exposure age data and/or radiocarbon-dated lakes. Gray boxes mark rejected data. Colored envelopes denote PATR median and 95% credible intervals for local Antarctic Ice Sheet elevation (left panel) and rate of thinning (right panel).

2007  
 2008  
 2009  
 2010  
 2011  
 2012  
 2013  
 2014  
 2015  
 2016  
 2017  
 2018  
 2019  
 2020  
 2021  
 2022  
 2023  
 2024  
 2025  
 2026  
 2027  
 2028  
 2029  
 2030  
 2031  
 2032  
 2033  
 2034  
 2035  
 2036  
 2037  
 2038  
 2039  
 2040  
 2041  
 2042  
 2043  
 2044  
 2045  
 2046  
 2047  
 2048  
 2049  
 2050  
 2051  
 2052  
 2053  
 2054  
 2055  
 2056  
 2057  
 2058  
 2059  
 2060  
 2061  
 2062  
 2063  
 2064  
 2065

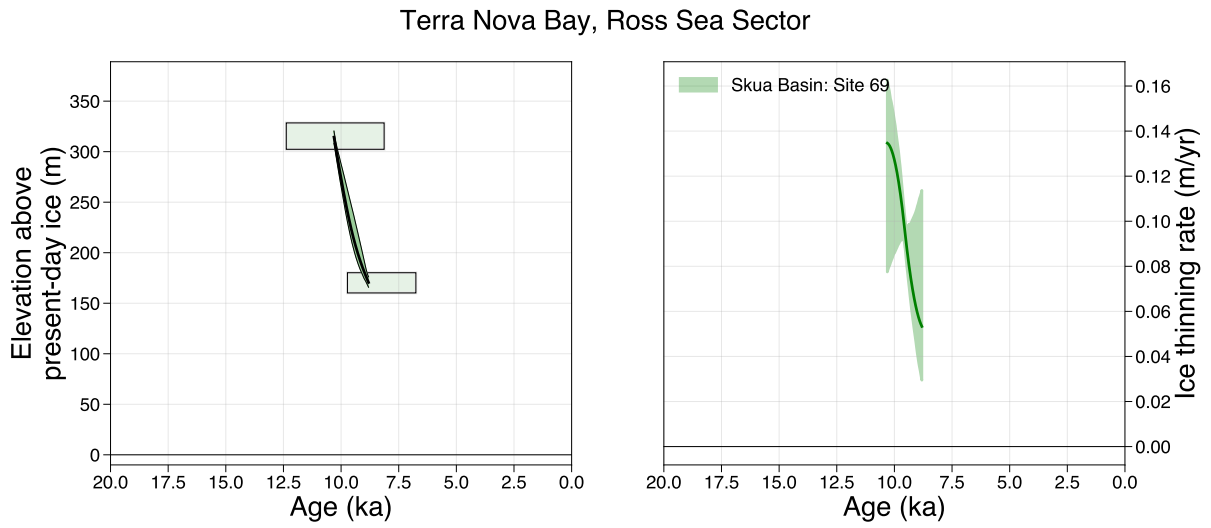

**Fig. S41** Thinning histories from Terra Nova Bay Ross SEa Sector. Colored boxes mark cosmogenic nuclide exposure age data and/or radiocarbon-dated lakes. Gray boxes mark rejected data. Colored envelopes denote PATR median and 95% credible intervals for local Antarctic Ice Sheet elevation (left panel) and rate of thinning (right panel).

2066  
 2067  
 2068  
 2069  
 2070  
 2071  
 2072  
 2073  
 2074  
 2075  
 2076  
 2077  
 2078  
 2079  
 2080  
 2081  
 2082  
 2083  
 2084  
 2085  
 2086  
 2087  
 2088  
 2089  
 2090  
 2091  
 2092  
 2093  
 2094  
 2095  
 2096  
 2097  
 2098  
 2099  
 2100  
 2101  
 2102  
 2103  
 2104  
 2105  
 2106  
 2107  
 2108  
 2109  
 2110  
 2111  
 2112  
 2113  
 2114  
 2115  
 2116  
 2117  
 2118  
 2119  
 2120  
 2121  
 2122  
 2123  
 2124

Sør Rondane Mountains, Ross Sea Sector

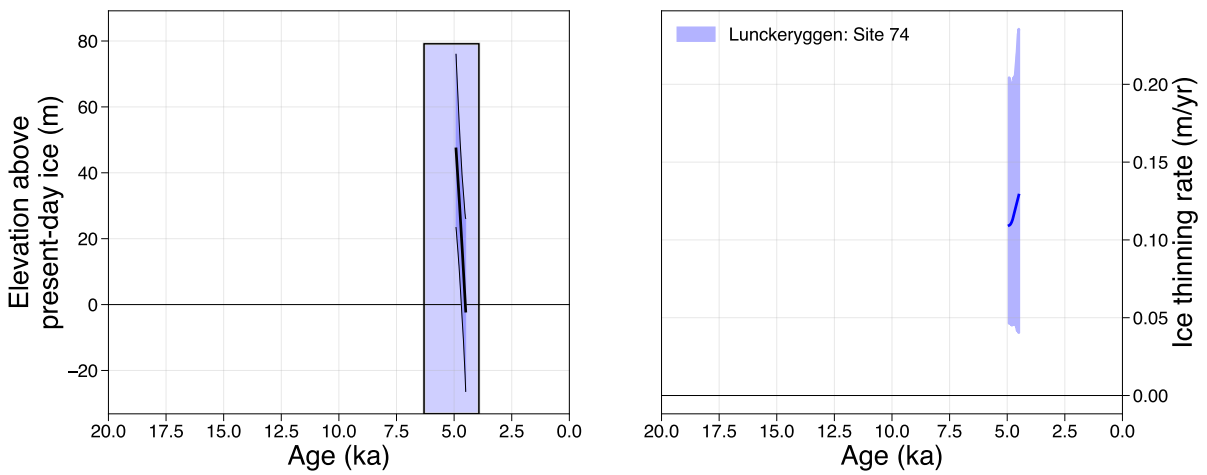

**Fig. S42** Thinning histories from Sør Rondane Mountains Ross Sea Sector. Colored boxes mark cosmogenic nuclide exposure age data and/or radiocarbon-dated lakes. Gray boxes mark rejected data. Colored envelopes denote PATR median and 95% credible intervals for local Antarctic Ice Sheet elevation (left panel) and rate of thinning (right panel).

2125  
 2126  
 2127  
 2128  
 2129  
 2130  
 2131  
 2132  
 2133  
 2134  
 2135  
 2136  
 2137  
 2138  
 2139  
 2140  
 2141  
 2142  
 2143  
 2144  
 2145  
 2146  
 2147  
 2148  
 2149  
 2150  
 2151  
 2152  
 2153  
 2154  
 2155  
 2156  
 2157  
 2158  
 2159  
 2160  
 2161  
 2162  
 2163  
 2164  
 2165  
 2166  
 2167  
 2168  
 2169  
 2170  
 2171  
 2172  
 2173  
 2174  
 2175  
 2176  
 2177  
 2178  
 2179  
 2180  
 2181  
 2182  
 2183

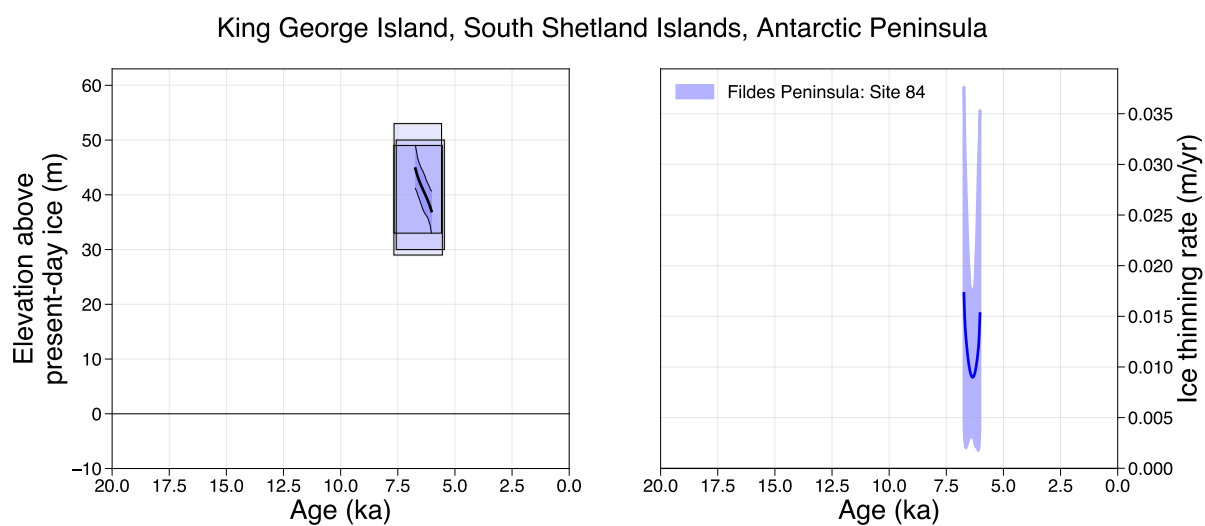

**Fig. S43** Thinning histories from King George Island South Shetland Islands Antarctic Peninsula. Colored boxes mark cosmogenic nuclide exposure age data and/or radiocarbon-dated lakes. Gray boxes mark rejected data. Colored envelopes denote PATR median and 95% credible intervals for local Antarctic Ice Sheet elevation (left panel) and rate of thinning (right panel).

2184  
 2185  
 2186  
 2187  
 2188  
 2189  
 2190  
 2191  
 2192  
 2193  
 2194  
 2195  
 2196  
 2197  
 2198  
 2199  
 2200  
 2201  
 2202  
 2203  
 2204  
 2205  
 2206  
 2207  
 2208  
 2209  
 2210  
 2211  
 2212  
 2213  
 2214  
 2215  
 2216  
 2217  
 2218  
 2219  
 2220  
 2221  
 2222  
 2223  
 2224  
 2225  
 2226  
 2227  
 2228  
 2229  
 2230  
 2231  
 2232  
 2233  
 2234  
 2235  
 2236  
 2237  
 2238  
 2239  
 2240  
 2241  
 2242

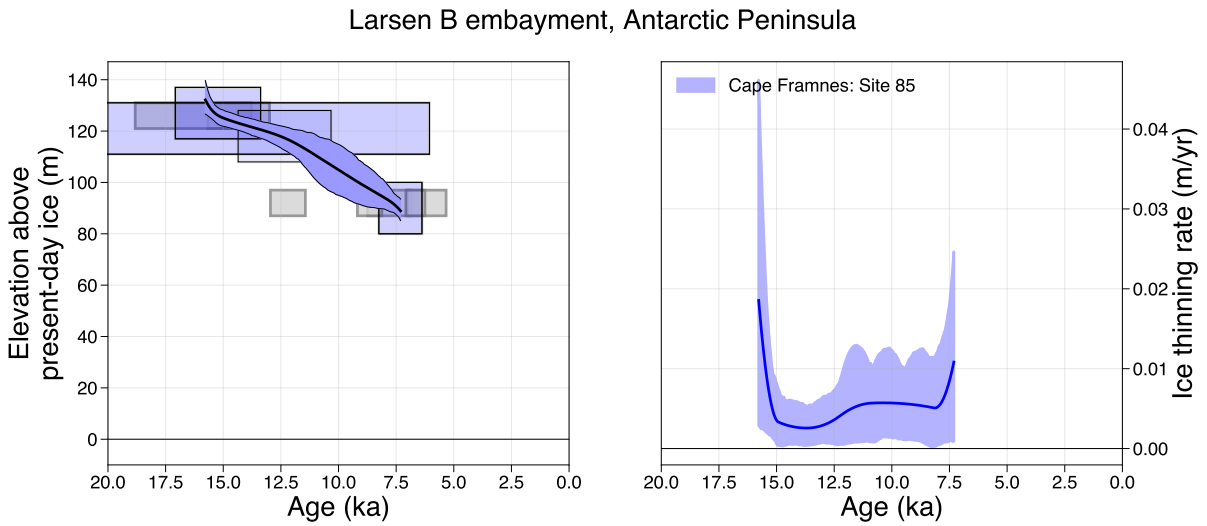

**Fig. S44** Thinning histories from Larsen B Embayment Antarctic Peninsula. Colored boxes mark cosmogenic nuclide exposure age data and/or radiocarbon-dated lakes. Gray boxes mark rejected data. Colored envelopes denote PATR median and 95% credible intervals for local Antarctic Ice Sheet elevation (left panel) and rate of thinning (right panel).

2243  
2244  
2245  
2246  
2247  
2248  
2249  
2250  
2251  
2252  
2253  
2254  
2255  
2256  
2257  
2258  
2259  
2260  
2261  
2262  
2263  
2264  
2265  
2266  
2267  
2268  
2269  
2270  
2271  
2272  
2273  
2274  
2275  
2276  
2277  
2278  
2279  
2280  
2281  
2282  
2283  
2284  
2285  
2286  
2287  
2288  
2289  
2290  
2291  
2292  
2293  
2294  
2295  
2296  
2297  
2298  
2299  
2300  
2301

### Robertson Island, Larsen B embayment, Antarctic Peninsula

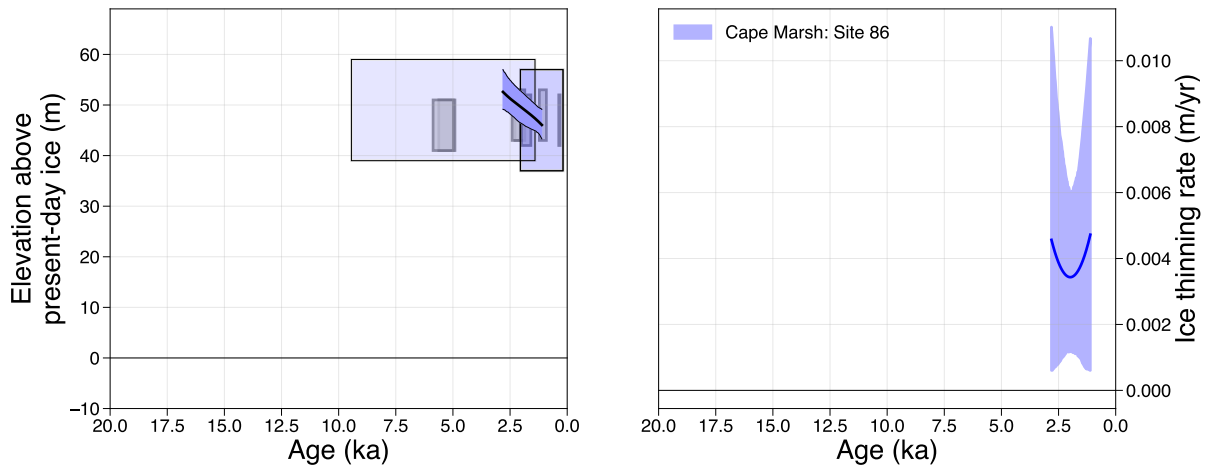

**Fig. S45** Thinning histories from Robertson Island Larsen B Embayment Antarctic Peninsula. Colored boxes mark cosmogenic nuclide exposure age data and/or radiocarbon-dated lakes. Gray boxes mark rejected data. Colored envelopes denote PATR median and 95% credible intervals for local Antarctic Ice Sheet elevation (left panel) and rate of thinning (right panel).

2302  
 2303  
 2304  
 2305  
 2306  
 2307  
 2308  
 2309  
 2310  
 2311  
 2312  
 2313  
 2314  
 2315  
 2316  
 2317  
 2318  
 2319  
 2320  
 2321  
 2322  
 2323  
 2324  
 2325  
 2326  
 2327  
 2328  
 2329  
 2330  
 2331  
 2332  
 2333  
 2334  
 2335  
 2336  
 2337  
 2338  
 2339  
 2340  
 2341  
 2342  
 2343  
 2344  
 2345  
 2346  
 2347  
 2348  
 2349  
 2350  
 2351  
 2352  
 2353  
 2354  
 2355  
 2356  
 2357  
 2358  
 2359  
 2360

Sjogren/Boydell fjord, Antarctic Peninsula

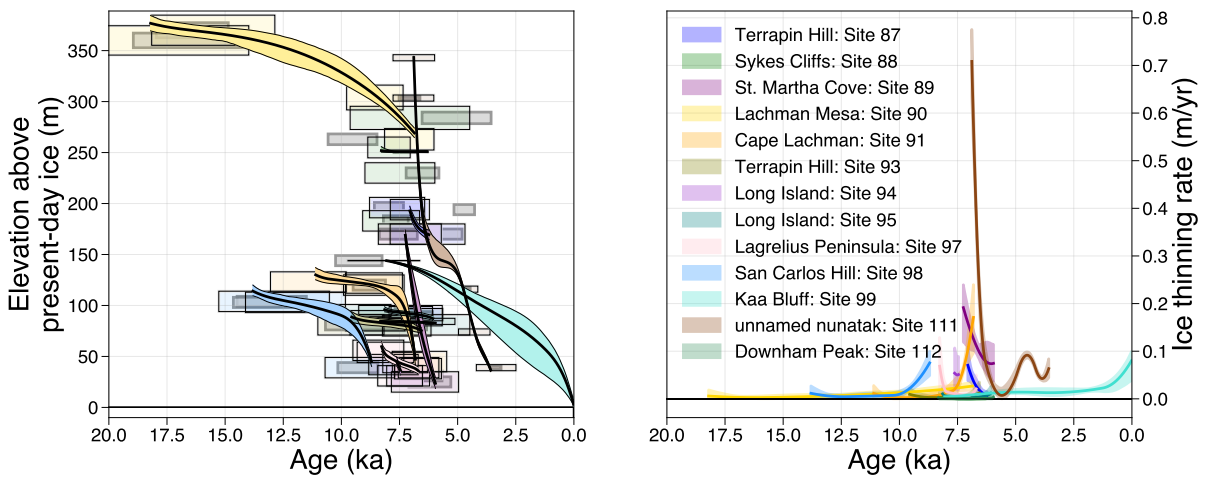

**Fig. S46** Thinning histories from Sjogren/Boydell fjord Antarctic Peninsula. Colored boxes mark cosmogenic nuclide exposure age data and/or radiocarbon-dated lakes. Gray boxes mark rejected data. Colored envelopes denote PATR median and 95% credible intervals for local Antarctic Ice Sheet elevation (left panel) and rate of thinning (right panel).

2361  
 2362  
 2363  
 2364  
 2365  
 2366  
 2367  
 2368  
 2369  
 2370  
 2371  
 2372  
 2373  
 2374  
 2375  
 2376  
 2377  
 2378  
 2379  
 2380  
 2381  
 2382  
 2383  
 2384  
 2385  
 2386  
 2387  
 2388  
 2389  
 2390  
 2391  
 2392  
 2393  
 2394  
 2395  
 2396  
 2397  
 2398  
 2399  
 2400  
 2401  
 2402  
 2403  
 2404  
 2405  
 2406  
 2407  
 2408  
 2409  
 2410  
 2411  
 2412  
 2413  
 2414  
 2415  
 2416  
 2417  
 2418  
 2419

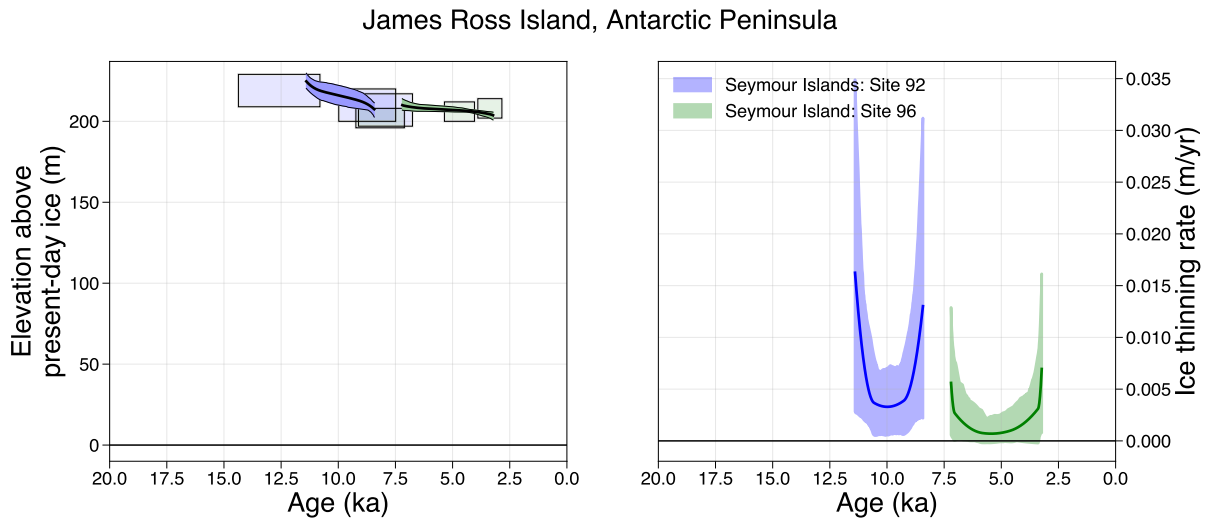

**Fig. S47** Thinning histories from James Ross Island Antarctic Peninsula. Colored boxes mark cosmogenic nuclide exposure age data and/or radiocarbon-dated lakes. Gray boxes mark rejected data. Colored envelopes denote PATR median and 95% credible intervals for local Antarctic Ice Sheet elevation (left panel) and rate of thinning (right panel).

2420  
2421  
2422  
2423  
2424  
2425  
2426  
2427  
2428  
2429  
2430  
2431  
2432  
2433  
2434  
2435  
2436  
2437  
2438  
2439  
2440  
2441  
2442  
2443  
2444  
2445  
2446  
2447  
2448  
2449  
2450  
2451  
2452  
2453  
2454  
2455  
2456  
2457  
2458  
2459  
2460  
2461  
2462  
2463  
2464  
2465  
2466  
2467  
2468  
2469  
2470  
2471  
2472  
2473  
2474  
2475  
2476  
2477  
2478

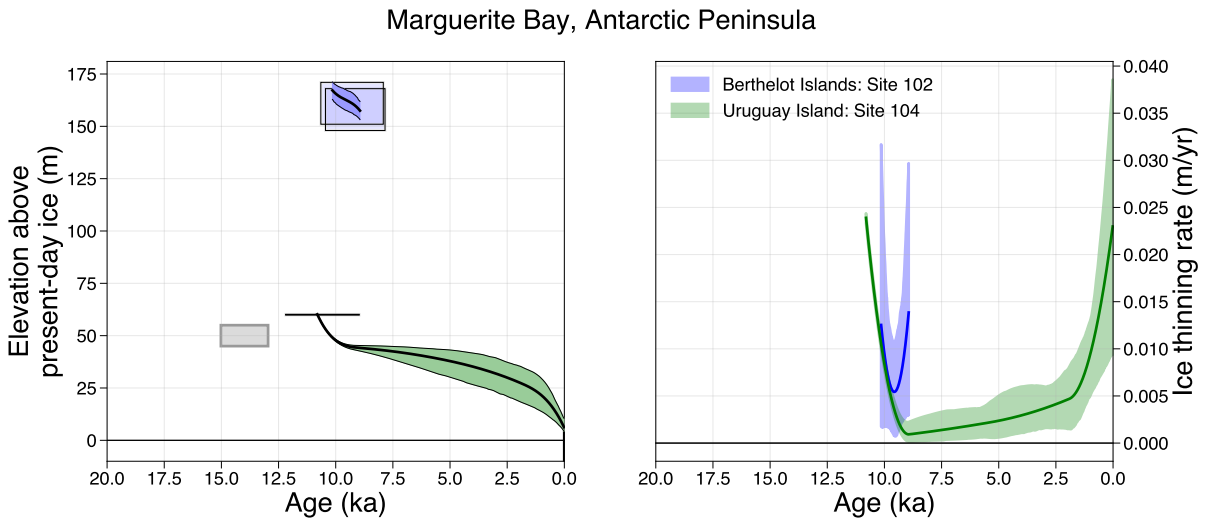

**Fig. S48** Thinning histories from Marguerite Bay Antarctic Peninsula. Colored boxes mark cosmogenic nuclide exposure age data and/or radiocarbon-dated lakes. Gray boxes mark rejected data. Colored envelopes denote PATR median and 95% credible intervals for local Antarctic Ice Sheet elevation (left panel) and rate of thinning (right panel).

2479  
 2480  
 2481  
 2482  
 2483  
 2484  
 2485  
 2486  
 2487  
 2488  
 2489  
 2490  
 2491  
 2492  
 2493  
 2494  
 2495  
 2496  
 2497  
 2498  
 2499  
 2500  
 2501  
 2502  
 2503  
 2504  
 2505  
 2506  
 2507  
 2508  
 2509  
 2510  
 2511  
 2512  
 2513  
 2514  
 2515  
 2516  
 2517  
 2518  
 2519  
 2520  
 2521  
 2522  
 2523  
 2524  
 2525  
 2526  
 2527  
 2528  
 2529  
 2530  
 2531  
 2532  
 2533  
 2534  
 2535  
 2536  
 2537

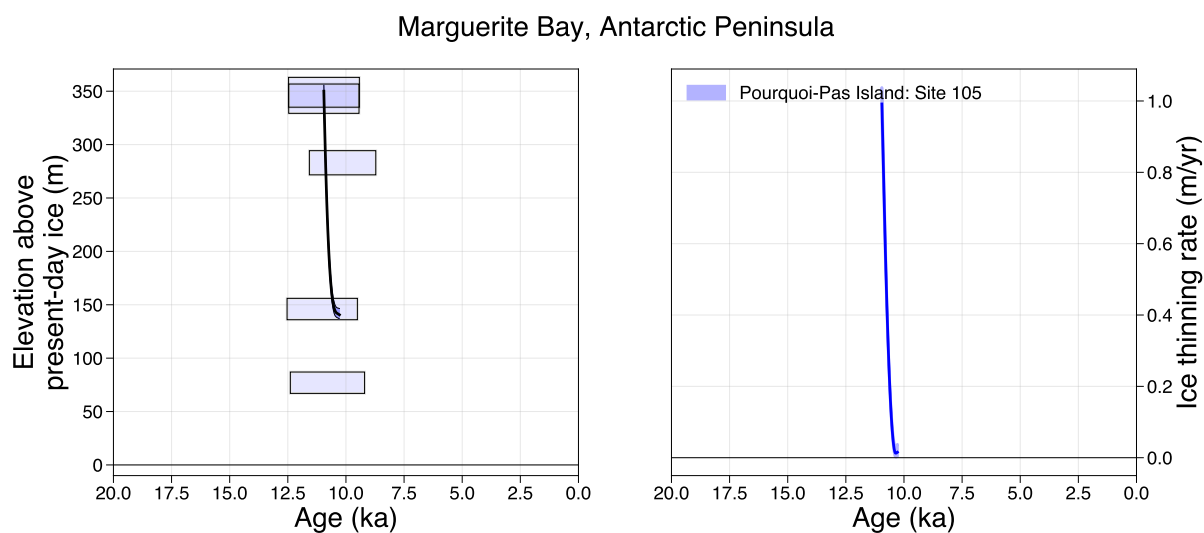

**Fig. S49** Thinning histories from Marguerite Bay Antarctic Peninsula. Colored boxes mark cosmogenic nuclide exposure age data and/or radiocarbon-dated lakes. Gray boxes mark rejected data. Colored envelopes denote PATR median and 95% credible intervals for local Antarctic Ice Sheet elevation (left panel) and rate of thinning (right panel).

2538  
2539  
2540  
2541  
2542  
2543  
2544  
2545  
2546  
2547  
2548  
2549  
2550  
2551  
2552  
2553  
2554  
2555  
2556  
2557  
2558  
2559  
2560  
2561  
2562  
2563  
2564  
2565  
2566  
2567  
2568  
2569  
2570  
2571  
2572  
2573  
2574  
2575  
2576  
2577  
2578  
2579  
2580  
2581  
2582  
2583  
2584  
2585  
2586  
2587  
2588  
2589  
2590  
2591  
2592  
2593  
2594  
2595  
2596

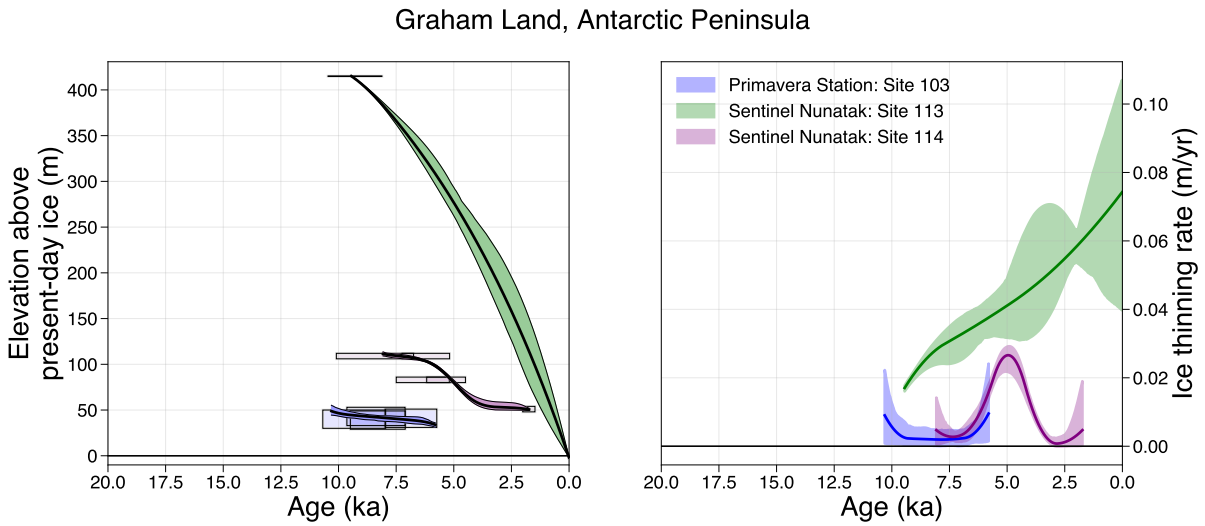

**Fig. S50** Thinning histories from Graham Land Antarctic Peninsula. Colored boxes mark cosmogenic nuclide exposure age data and/or radiocarbon-dated lakes. Gray boxes mark rejected data. Colored envelopes denote PATR median and 95% credible intervals for local Antarctic Ice Sheet elevation (left panel) and rate of thinning (right panel).

2597  
 2598  
 2599  
 2600  
 2601  
 2602  
 2603  
 2604  
 2605  
 2606  
 2607  
 2608  
 2609  
 2610  
 2611  
 2612  
 2613  
 2614  
 2615  
 2616  
 2617  
 2618  
 2619  
 2620  
 2621  
 2622  
 2623  
 2624  
 2625  
 2626  
 2627  
 2628  
 2629  
 2630  
 2631  
 2632  
 2633  
 2634  
 2635  
 2636  
 2637  
 2638  
 2639  
 2640  
 2641  
 2642  
 2643  
 2644  
 2645  
 2646  
 2647  
 2648  
 2649  
 2650  
 2651  
 2652  
 2653  
 2654  
 2655

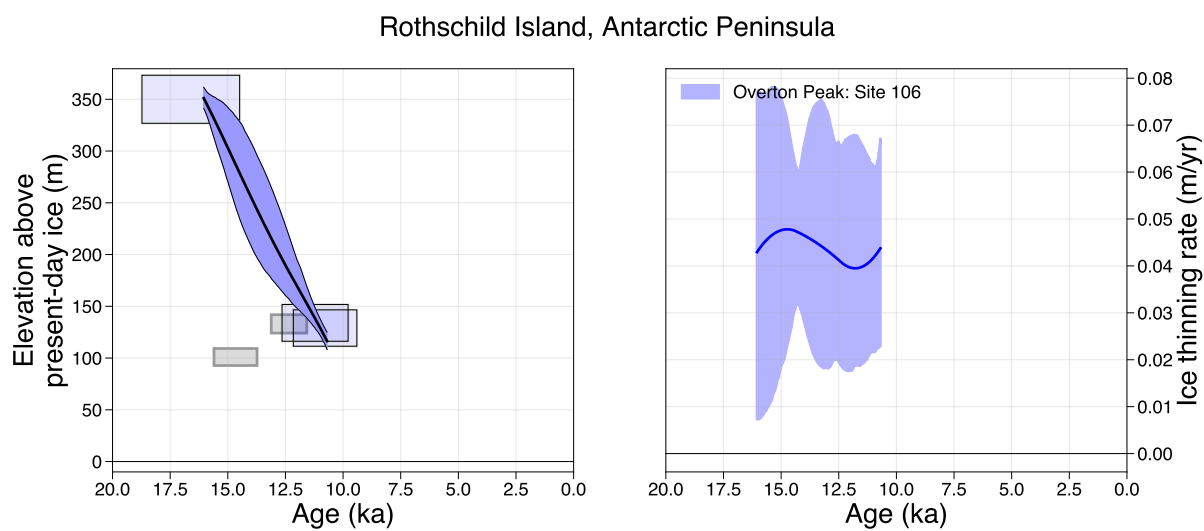

**Fig. S51** Thinning histories from Rothschild Island Antarctic Peninsula. Colored boxes mark cosmogenic nuclide exposure age data and/or radiocarbon-dated lakes. Gray boxes mark rejected data. Colored envelopes denote PATR median and 95% credible intervals for local Antarctic Ice Sheet elevation (left panel) and rate of thinning (right panel).

2656  
 2657  
 2658  
 2659  
 2660  
 2661  
 2662  
 2663  
 2664  
 2665  
 2666  
 2667  
 2668  
 2669  
 2670  
 2671  
 2672  
 2673  
 2674  
 2675  
 2676  
 2677  
 2678  
 2679  
 2680  
 2681  
 2682  
 2683  
 2684  
 2685  
 2686  
 2687  
 2688  
 2689  
 2690  
 2691  
 2692  
 2693  
 2694  
 2695  
 2696  
 2697  
 2698  
 2699  
 2700  
 2701  
 2702  
 2703  
 2704  
 2705  
 2706  
 2707  
 2708  
 2709  
 2710  
 2711  
 2712  
 2713  
 2714

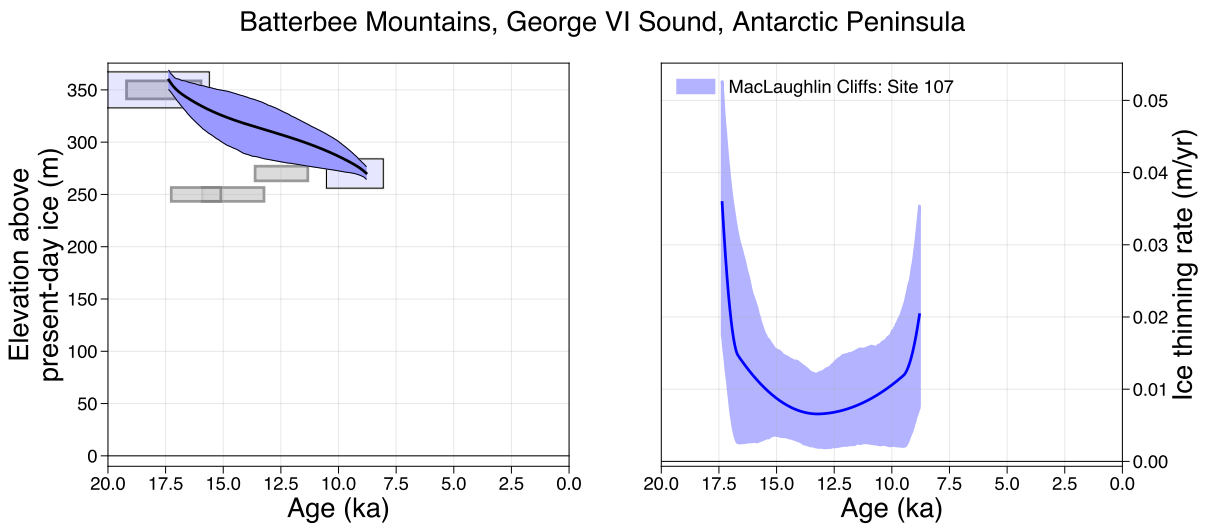

**Fig. S52** Thinning histories from Batterbee Mountains George VI Sound Antarctic Peninsula. Colored boxes mark cosmogenic nuclide exposure age data and/or radiocarbon-dated lakes. Gray boxes mark rejected data. Colored envelopes denote PATR median and 95% credible intervals for local Antarctic Ice Sheet elevation (left panel) and rate of thinning (right panel).

2715  
2716  
2717  
2718  
2719  
2720  
2721  
2722  
2723  
2724  
2725  
2726  
2727  
2728  
2729  
2730  
2731  
2732  
2733  
2734  
2735  
2736  
2737  
2738  
2739  
2740  
2741  
2742  
2743  
2744  
2745  
2746  
2747  
2748  
2749  
2750  
2751  
2752  
2753  
2754  
2755  
2756  
2757  
2758  
2759  
2760  
2761  
2762  
2763  
2764  
2765  
2766  
2767  
2768  
2769  
2770  
2771  
2772  
2773

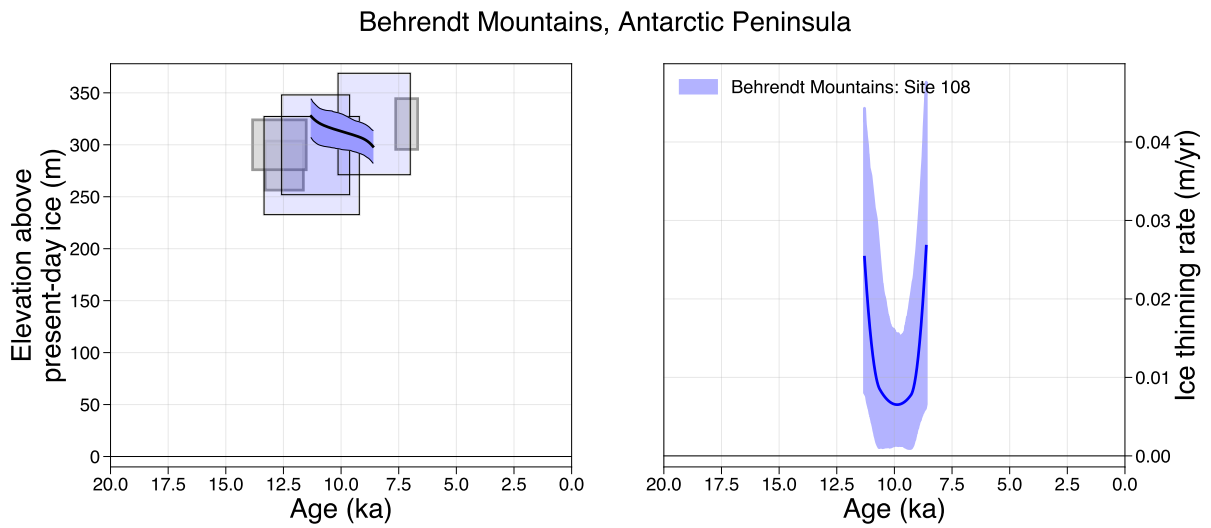

**Fig. S53** Thinning histories from Behrendt Mountains Antarctic Peninsula. Colored boxes mark cosmogenic nuclide exposure age data and/or radiocarbon-dated lakes. Gray boxes mark rejected data. Colored envelopes denote PATR median and 95% credible intervals for local Antarctic Ice Sheet elevation (left panel) and rate of thinning (right panel).

2774  
 2775  
 2776  
 2777  
 2778  
 2779  
 2780  
 2781  
 2782  
 2783  
 2784  
 2785  
 2786  
 2787  
 2788  
 2789  
 2790  
 2791  
 2792  
 2793  
 2794  
 2795  
 2796  
 2797  
 2798  
 2799  
 2800  
 2801  
 2802  
 2803  
 2804  
 2805  
 2806  
 2807  
 2808  
 2809  
 2810  
 2811  
 2812  
 2813  
 2814  
 2815  
 2816  
 2817  
 2818  
 2819  
 2820  
 2821  
 2822  
 2823  
 2824  
 2825  
 2826  
 2827  
 2828  
 2829  
 2830  
 2831  
 2832

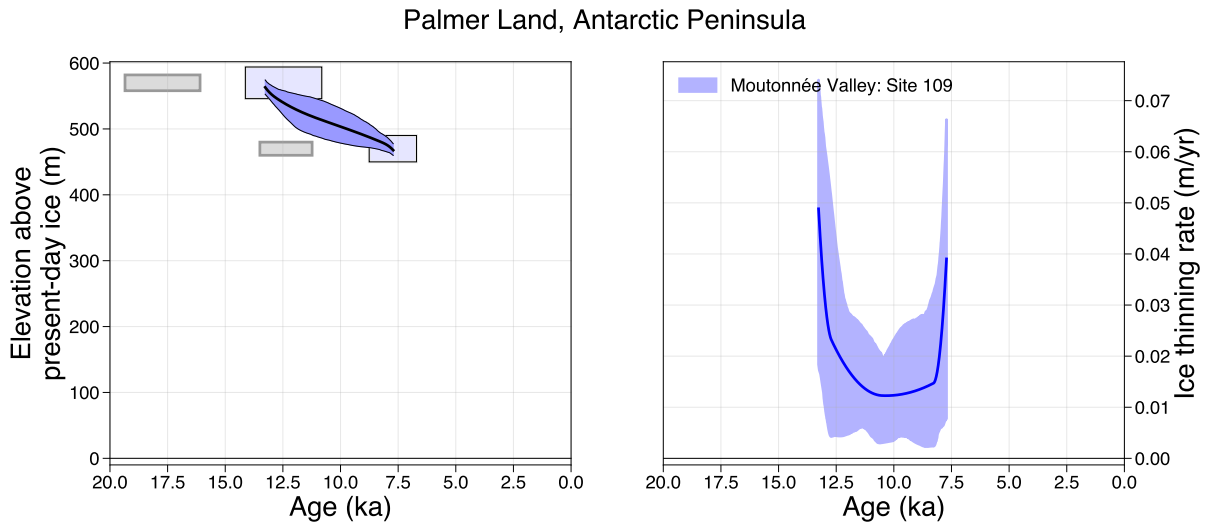

**Fig. S54** Thinning histories from Palmer Land Antarctic Peninsula. Colored boxes mark cosmogenic nuclide exposure age data and/or radiocarbon-dated lakes. Gray boxes mark rejected data. Colored envelopes denote PATR median and 95% credible intervals for local Antarctic Ice Sheet elevation (left panel) and rate of thinning (right panel).

2833  
 2834  
 2835  
 2836  
 2837  
 2838  
 2839  
 2840  
 2841  
 2842  
 2843  
 2844  
 2845  
 2846  
 2847  
 2848  
 2849  
 2850  
 2851  
 2852  
 2853  
 2854  
 2855  
 2856  
 2857  
 2858  
 2859  
 2860  
 2861  
 2862  
 2863  
 2864  
 2865  
 2866  
 2867  
 2868  
 2869  
 2870  
 2871  
 2872  
 2873  
 2874  
 2875  
 2876  
 2877  
 2878  
 2879  
 2880  
 2881  
 2882  
 2883  
 2884  
 2885  
 2886  
 2887  
 2888  
 2889  
 2890  
 2891

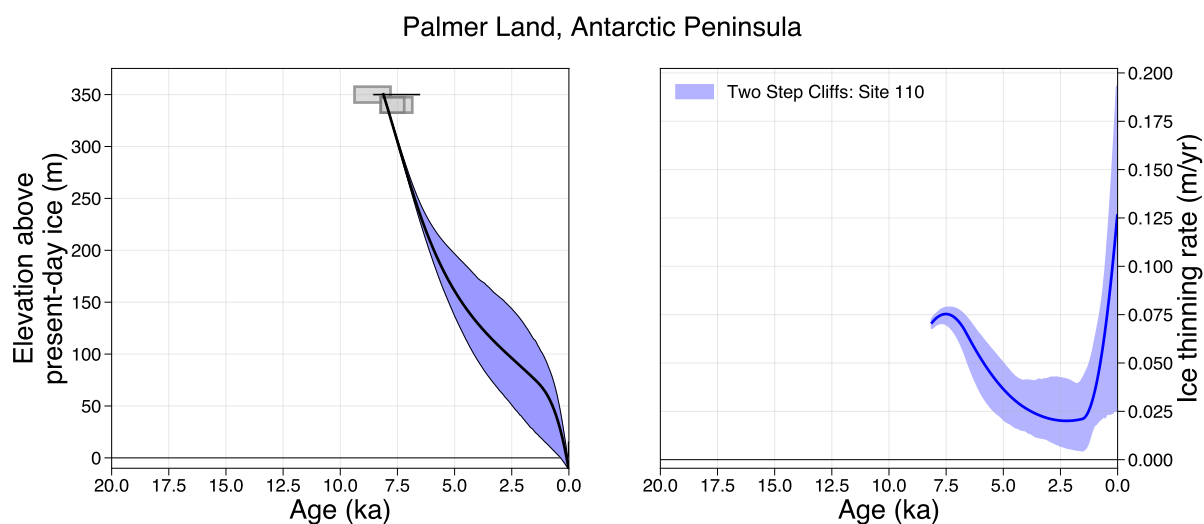

**Fig. S55** Thinning histories from Palmer Land Antarctic Peninsula. Colored boxes mark cosmogenic nuclide exposure age data and/or radiocarbon-dated lakes. Gray boxes mark rejected data. Colored envelopes denote PATR median and 95% credible intervals for local Antarctic Ice Sheet elevation (left panel) and rate of thinning (right panel).

2892  
 2893  
 2894  
 2895  
 2896  
 2897  
 2898  
 2899  
 2900  
 2901  
 2902  
 2903  
 2904  
 2905  
 2906  
 2907  
 2908  
 2909  
 2910  
 2911  
 2912  
 2913  
 2914  
 2915  
 2916  
 2917  
 2918  
 2919  
 2920  
 2921  
 2922  
 2923  
 2924  
 2925  
 2926  
 2927  
 2928  
 2929  
 2930  
 2931  
 2932  
 2933  
 2934  
 2935  
 2936  
 2937  
 2938  
 2939  
 2940  
 2941  
 2942  
 2943  
 2944  
 2945  
 2946  
 2947  
 2948  
 2949  
 2950

Neptune Range, Pensacola Mountains, Weddell Sea Embayment

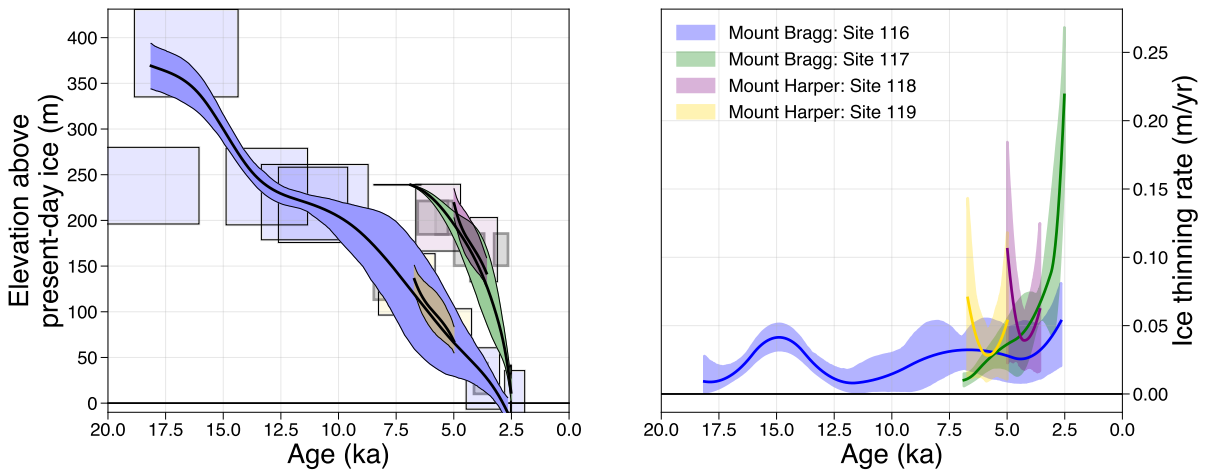

**Fig. S56** Thinning histories from Neptune Range Pensacola Mountains Weddell Sea Embayment. Colored boxes mark cosmogenic nuclide exposure age data and/or radiocarbon-dated lakes. Gray boxes mark rejected data. Colored envelopes denote PATR median and 95% credible intervals for local Antarctic Ice Sheet elevation (left panel) and rate of thinning (right panel).

2951  
 2952  
 2953  
 2954  
 2955  
 2956  
 2957  
 2958  
 2959  
 2960  
 2961  
 2962  
 2963  
 2964  
 2965  
 2966  
 2967  
 2968  
 2969  
 2970  
 2971  
 2972  
 2973  
 2974  
 2975  
 2976  
 2977  
 2978  
 2979  
 2980  
 2981  
 2982  
 2983  
 2984  
 2985  
 2986  
 2987  
 2988  
 2989  
 2990  
 2991  
 2992  
 2993  
 2994  
 2995  
 2996  
 2997  
 2998  
 2999  
 3000  
 3001  
 3002  
 3003  
 3004  
 3005  
 3006  
 3007  
 3008  
 3009

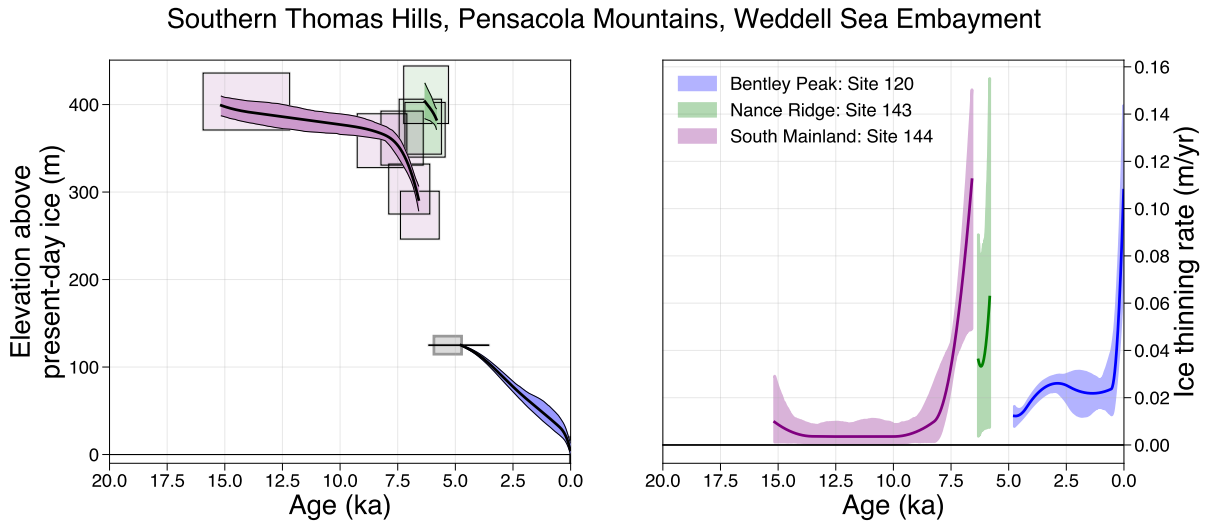

**Fig. S57** Thinning histories from Southern Thomas Hills Pensacola Mountains Weddell Sea Embayment. Colored boxes mark cosmogenic nuclide exposure age data and/or radiocarbon-dated lakes. Gray boxes mark rejected data. Colored envelopes denote PATR median and 95% credible intervals for local Antarctic Ice Sheet elevation (left panel) and rate of thinning (right panel).

3010  
 3011  
 3012  
 3013  
 3014  
 3015  
 3016  
 3017  
 3018  
 3019  
 3020  
 3021  
 3022  
 3023  
 3024  
 3025  
 3026  
 3027  
 3028  
 3029  
 3030  
 3031  
 3032  
 3033  
 3034  
 3035  
 3036  
 3037  
 3038  
 3039  
 3040  
 3041  
 3042  
 3043  
 3044  
 3045  
 3046  
 3047  
 3048  
 3049  
 3050  
 3051  
 3052  
 3053  
 3054  
 3055  
 3056  
 3057  
 3058  
 3059  
 3060  
 3061  
 3062  
 3063  
 3064  
 3065  
 3066  
 3067  
 3068

Williams Hills, Pensacola Mountains, Weddell Sea Embayment

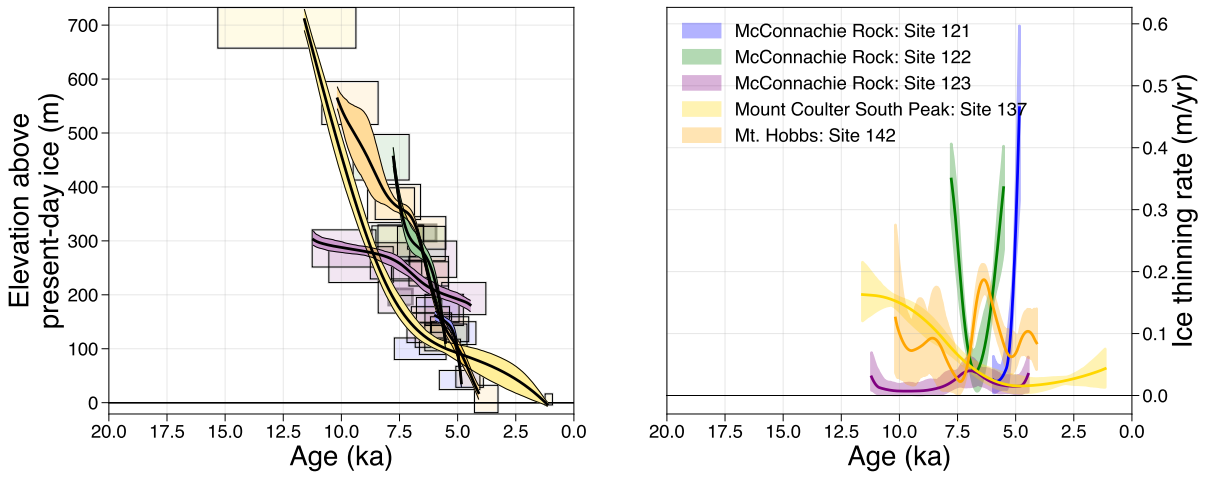

**Fig. S58** Thinning histories from Williams Hills Pensacola Mountains Weddell Sea Embayment. Colored boxes mark cosmogenic nuclide exposure age data and/or radiocarbon-dated lakes. Gray boxes mark rejected data. Colored envelopes denote PATR median and 95% credible intervals for local Antarctic Ice Sheet elevation (left panel) and rate of thinning (right panel).

3069  
 3070  
 3071  
 3072  
 3073  
 3074  
 3075  
 3076  
 3077  
 3078  
 3079  
 3080  
 3081  
 3082  
 3083  
 3084  
 3085  
 3086  
 3087  
 3088  
 3089  
 3090  
 3091  
 3092  
 3093  
 3094  
 3095  
 3096  
 3097  
 3098  
 3099  
 3100  
 3101  
 3102  
 3103  
 3104  
 3105  
 3106  
 3107  
 3108  
 3109  
 3110  
 3111  
 3112  
 3113  
 3114  
 3115  
 3116  
 3117  
 3118  
 3119  
 3120  
 3121  
 3122  
 3123  
 3124  
 3125  
 3126  
 3127

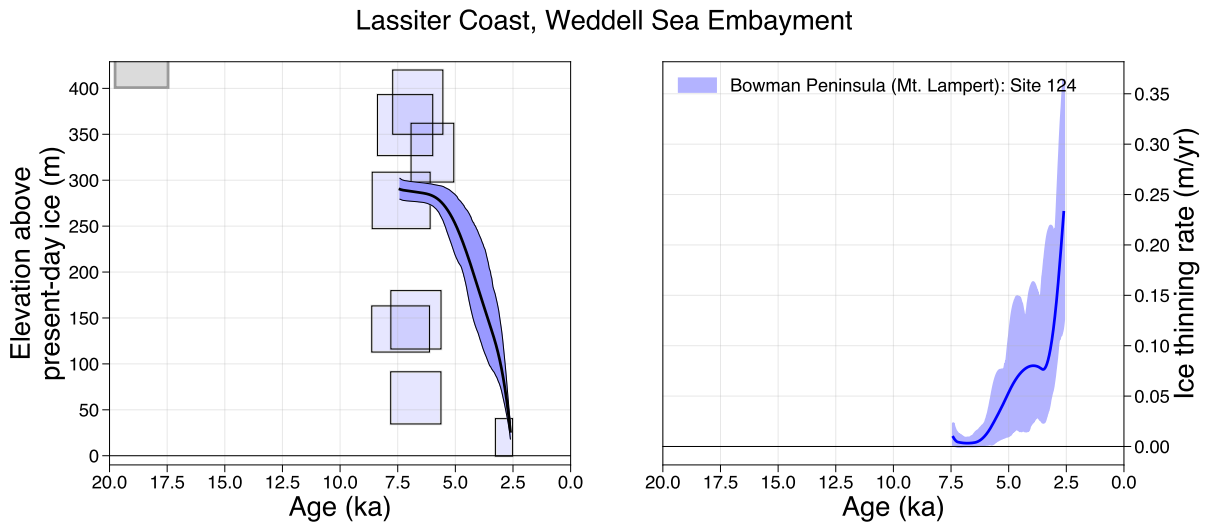

**Fig. S59** Thinning histories from Lassiter Coast Weddell Sea Embayment. Colored boxes mark cosmogenic nuclide exposure age data and/or radiocarbon-dated lakes. Gray boxes mark rejected data. Colored envelopes denote PATR median and 95% credible intervals for local Antarctic Ice Sheet elevation (left panel) and rate of thinning (right panel).

3128  
 3129  
 3130  
 3131  
 3132  
 3133  
 3134  
 3135  
 3136  
 3137  
 3138  
 3139  
 3140  
 3141  
 3142  
 3143  
 3144  
 3145  
 3146  
 3147  
 3148  
 3149  
 3150  
 3151  
 3152  
 3153  
 3154  
 3155  
 3156  
 3157  
 3158  
 3159  
 3160  
 3161  
 3162  
 3163  
 3164  
 3165  
 3166  
 3167  
 3168  
 3169  
 3170  
 3171  
 3172  
 3173  
 3174  
 3175  
 3176  
 3177  
 3178  
 3179  
 3180  
 3181  
 3182  
 3183  
 3184  
 3185  
 3186

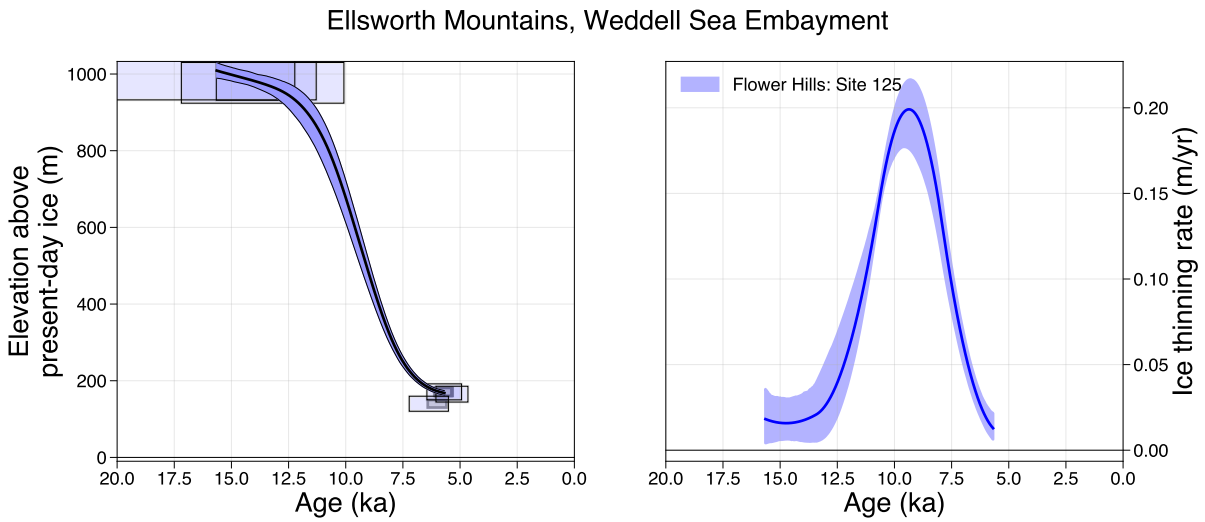

**Fig. S60** Thinning histories from Ellsworth Mountains Weddell Sea Embayment. Colored boxes mark cosmogenic nuclide exposure age data and/or radiocarbon-dated lakes. Gray boxes mark rejected data. Colored envelopes denote PATR median and 95% credible intervals for local Antarctic Ice Sheet elevation (left panel) and rate of thinning (right panel).

3187  
 3188  
 3189  
 3190  
 3191  
 3192  
 3193  
 3194  
 3195  
 3196  
 3197  
 3198  
 3199  
 3200  
 3201  
 3202  
 3203  
 3204  
 3205  
 3206  
 3207  
 3208  
 3209  
 3210  
 3211  
 3212  
 3213  
 3214  
 3215  
 3216  
 3217  
 3218  
 3219  
 3220  
 3221  
 3222  
 3223  
 3224  
 3225  
 3226  
 3227  
 3228  
 3229  
 3230  
 3231  
 3232  
 3233  
 3234  
 3235  
 3236  
 3237  
 3238  
 3239  
 3240  
 3241  
 3242  
 3243  
 3244  
 3245

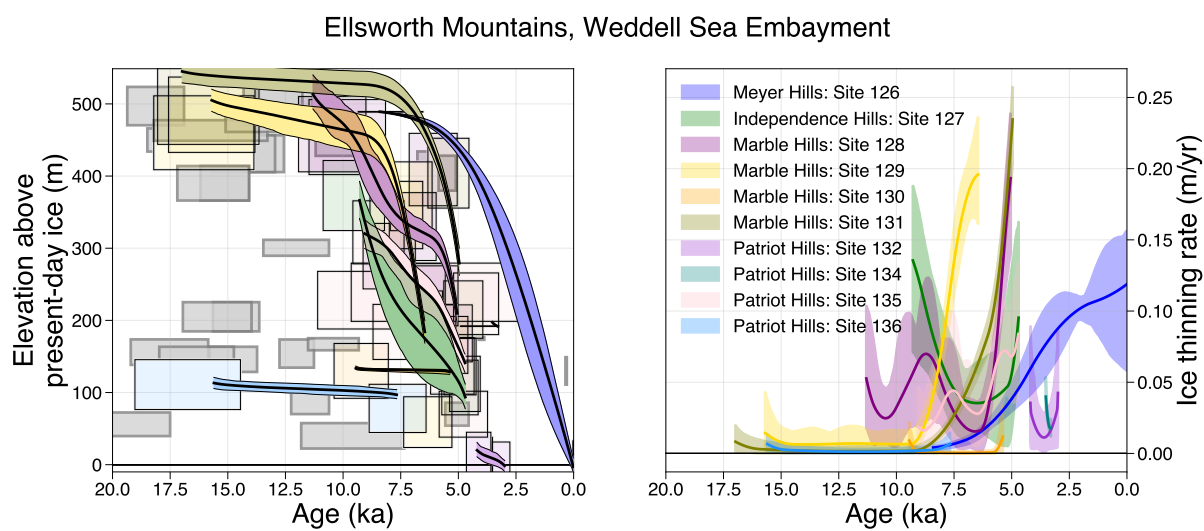

**Fig. S61** Thinning histories from Ellsworth Mountains Weddell Sea Embayment. Colored boxes mark cosmogenic nuclide exposure age data and/or radiocarbon-dated lakes. Gray boxes mark rejected data. Colored envelopes denote PATR median and 95% credible intervals for local Antarctic Ice Sheet elevation (left panel) and rate of thinning (right panel).

3246  
 3247  
 3248  
 3249  
 3250  
 3251  
 3252  
 3253  
 3254  
 3255  
 3256  
 3257  
 3258  
 3259  
 3260  
 3261  
 3262  
 3263  
 3264  
 3265  
 3266  
 3267  
 3268  
 3269  
 3270  
 3271  
 3272  
 3273  
 3274  
 3275  
 3276  
 3277  
 3278  
 3279  
 3280  
 3281  
 3282  
 3283  
 3284  
 3285  
 3286  
 3287  
 3288  
 3289  
 3290  
 3291  
 3292  
 3293  
 3294  
 3295  
 3296  
 3297  
 3298  
 3299  
 3300  
 3301  
 3302  
 3303  
 3304

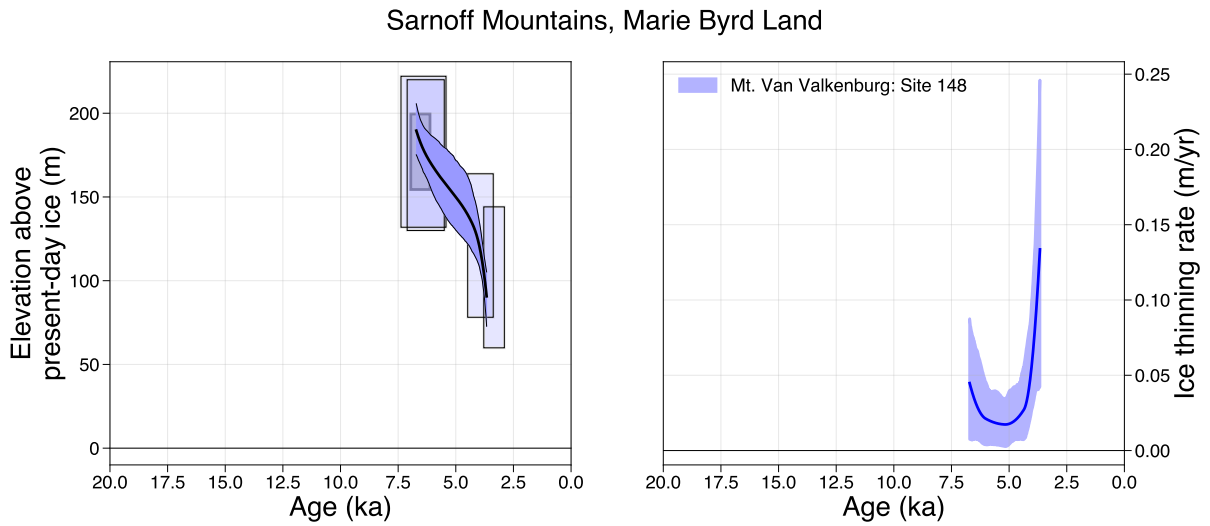

**Fig. S62** Thinning histories from Sarnoff Mountains Marie Byrd Land. Colored boxes mark cosmogenic nuclide exposure age data and/or radiocarbon-dated lakes. Gray boxes mark rejected data. Colored envelopes denote PATR median and 95% credible intervals for local Antarctic Ice Sheet elevation (left panel) and rate of thinning (right panel).

3305  
3306  
3307  
3308  
3309  
3310  
3311  
3312  
3313  
3314  
3315  
3316  
3317  
3318  
3319  
3320  
3321  
3322  
3323  
3324  
3325  
3326  
3327  
3328  
3329  
3330  
3331  
3332  
3333  
3334  
3335  
3336  
3337  
3338  
3339  
3340  
3341  
3342  
3343  
3344  
3345  
3346  
3347  
3348  
3349  
3350  
3351  
3352  
3353  
3354  
3355  
3356  
3357  
3358  
3359  
3360  
3361  
3362  
3363

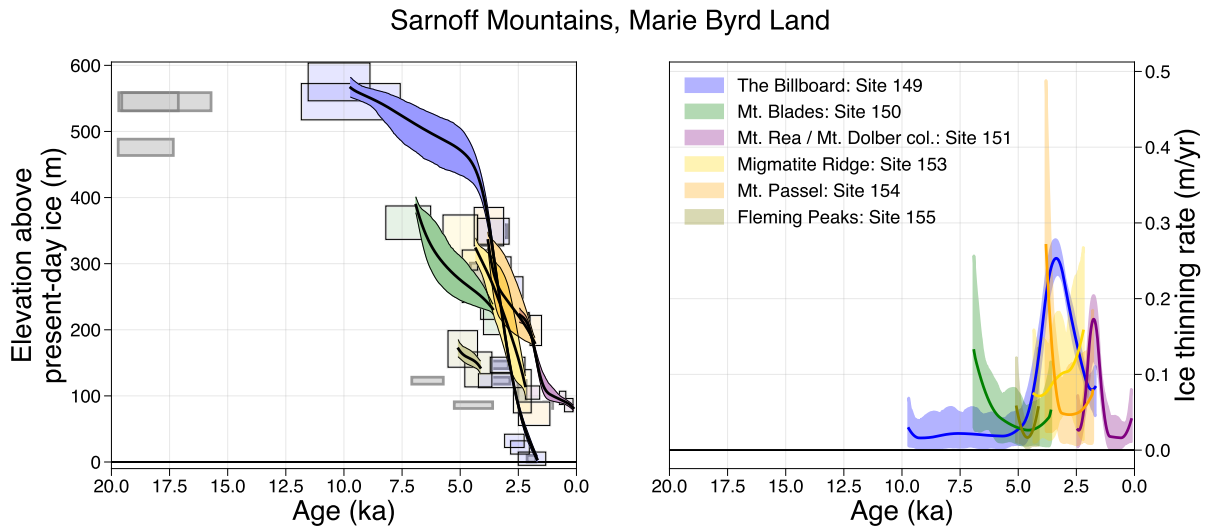

**Fig. S63** Thinning histories from Sarnoff Mountains Marie Byrd Land. Colored boxes mark cosmogenic nuclide exposure age data and/or radiocarbon-dated lakes. Gray boxes mark rejected data. Colored envelopes denote PATR median and 95% credible intervals for local Antarctic Ice Sheet elevation (left panel) and rate of thinning (right panel).

3364  
 3365  
 3366  
 3367  
 3368  
 3369  
 3370  
 3371  
 3372  
 3373  
 3374  
 3375  
 3376  
 3377  
 3378  
 3379  
 3380  
 3381  
 3382  
 3383  
 3384  
 3385  
 3386  
 3387  
 3388  
 3389  
 3390  
 3391  
 3392  
 3393  
 3394  
 3395  
 3396  
 3397  
 3398  
 3399  
 3400  
 3401  
 3402  
 3403  
 3404  
 3405  
 3406  
 3407  
 3408  
 3409  
 3410  
 3411  
 3412  
 3413  
 3414  
 3415  
 3416  
 3417  
 3418  
 3419  
 3420  
 3421  
 3422

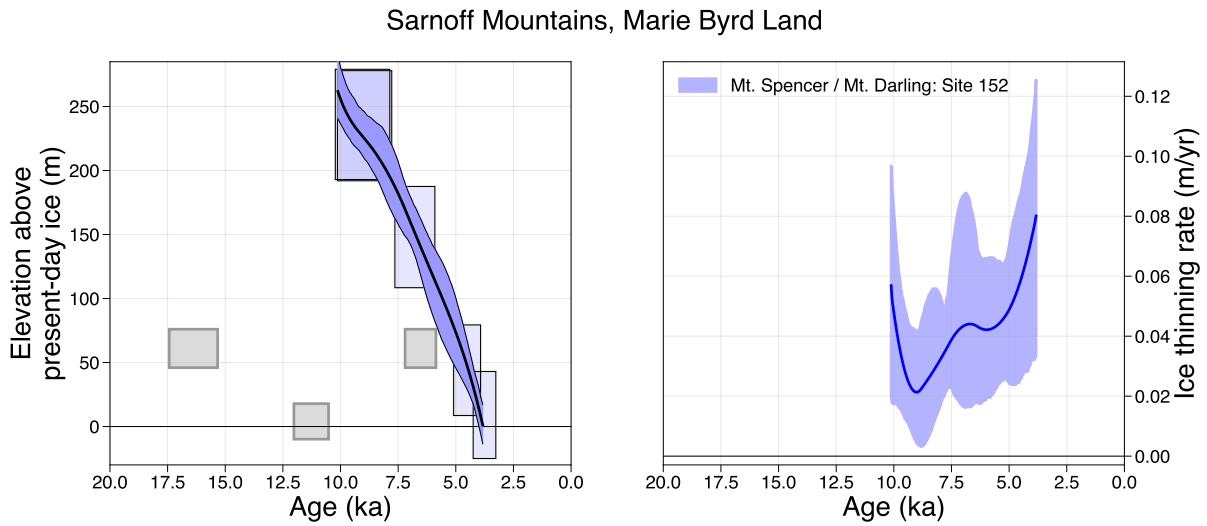

**Fig. S64** Thinning histories from Sarnoff Mountains Marie Byrd Land. Colored boxes mark cosmogenic nuclide exposure age data and/or radiocarbon-dated lakes. Gray boxes mark rejected data. Colored envelopes denote PATR median and 95% credible intervals for local Antarctic Ice Sheet elevation (left panel) and rate of thinning (right panel).

3423  
 3424  
 3425  
 3426  
 3427  
 3428  
 3429  
 3430  
 3431  
 3432  
 3433  
 3434  
 3435  
 3436  
 3437  
 3438  
 3439  
 3440  
 3441  
 3442  
 3443  
 3444  
 3445  
 3446  
 3447  
 3448  
 3449  
 3450  
 3451  
 3452  
 3453  
 3454  
 3455  
 3456  
 3457  
 3458  
 3459  
 3460  
 3461  
 3462  
 3463  
 3464  
 3465  
 3466  
 3467  
 3468  
 3469  
 3470  
 3471  
 3472  
 3473  
 3474  
 3475  
 3476  
 3477  
 3478  
 3479  
 3480  
 3481

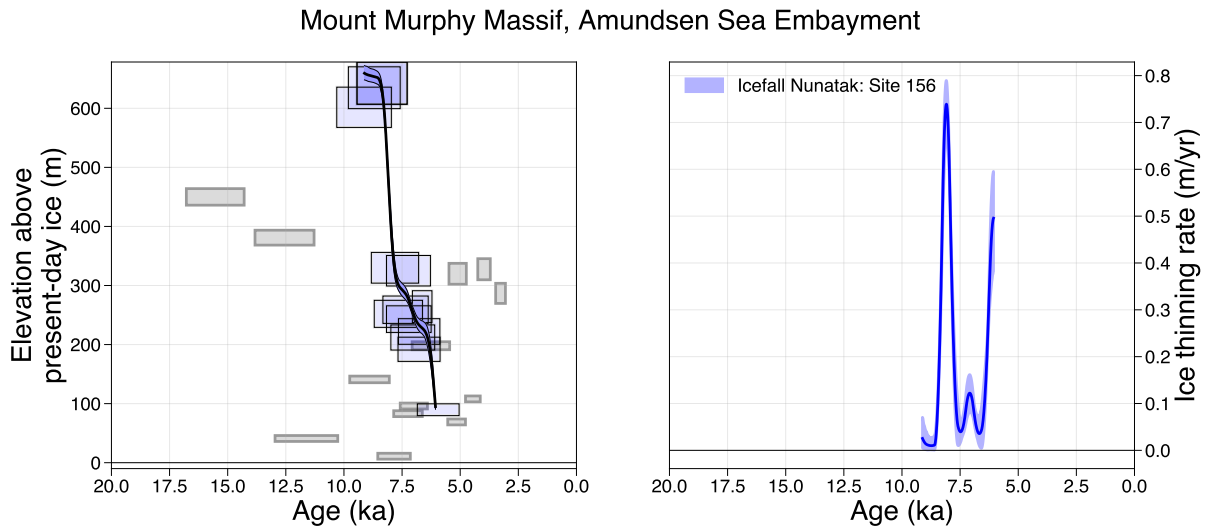

**Fig. S65** Thinning histories from Mount Murphy Massif Amundsen Sea Embayment. Colored boxes mark cosmogenic nuclide exposure age data and/or radiocarbon-dated lakes. Gray boxes mark rejected data. Colored envelopes denote PATR median and 95% credible intervals for local Antarctic Ice Sheet elevation (left panel) and rate of thinning (right panel).

3482  
3483  
3484  
3485  
3486  
3487  
3488  
3489  
3490  
3491  
3492  
3493  
3494  
3495  
3496  
3497  
3498  
3499  
3500  
3501  
3502  
3503  
3504  
3505  
3506  
3507  
3508  
3509  
3510  
3511  
3512  
3513  
3514  
3515  
3516  
3517  
3518  
3519  
3520  
3521  
3522  
3523  
3524  
3525  
3526  
3527  
3528  
3529  
3530  
3531  
3532  
3533  
3534  
3535  
3536  
3537  
3538  
3539  
3540

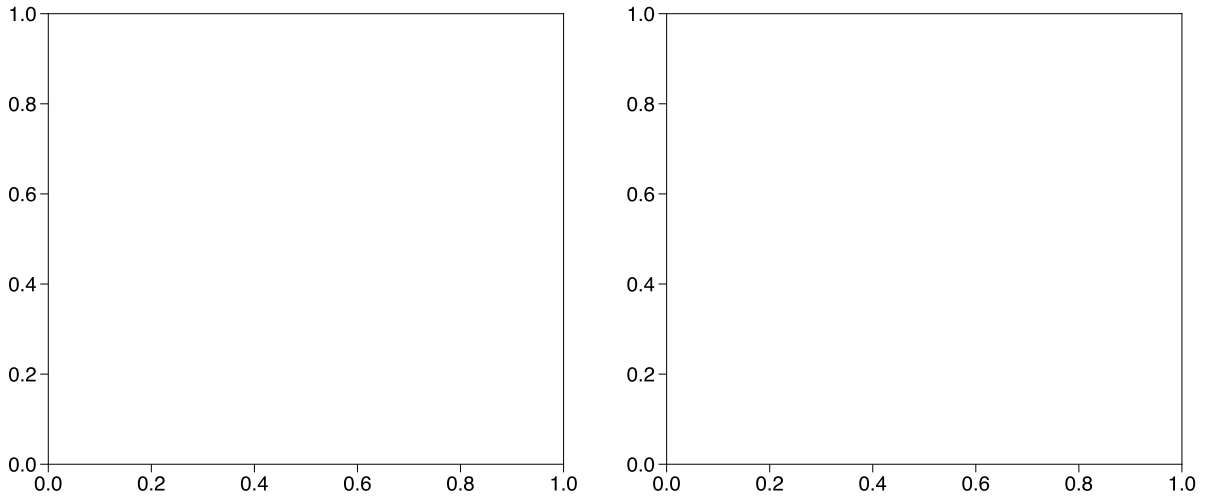

**Fig. S66** Thinning histories from Bear Peninsula Amundsen Sea Embayment. Colored boxes mark cosmogenic nuclide exposure age data and/or radiocarbon-dated lakes. Gray boxes mark rejected data. Colored envelopes denote PATR median and 95% credible intervals for local Antarctic Ice Sheet elevation (left panel) and rate of thinning (right panel).

3541  
 3542  
 3543  
 3544  
 3545  
 3546  
 3547  
 3548  
 3549  
 3550  
 3551  
 3552  
 3553  
 3554  
 3555  
 3556  
 3557  
 3558  
 3559  
 3560  
 3561  
 3562  
 3563  
 3564  
 3565  
 3566  
 3567  
 3568  
 3569  
 3570  
 3571  
 3572  
 3573  
 3574  
 3575  
 3576  
 3577  
 3578  
 3579  
 3580  
 3581  
 3582  
 3583  
 3584  
 3585  
 3586  
 3587  
 3588  
 3589  
 3590  
 3591  
 3592  
 3593  
 3594  
 3595  
 3596  
 3597  
 3598  
 3599

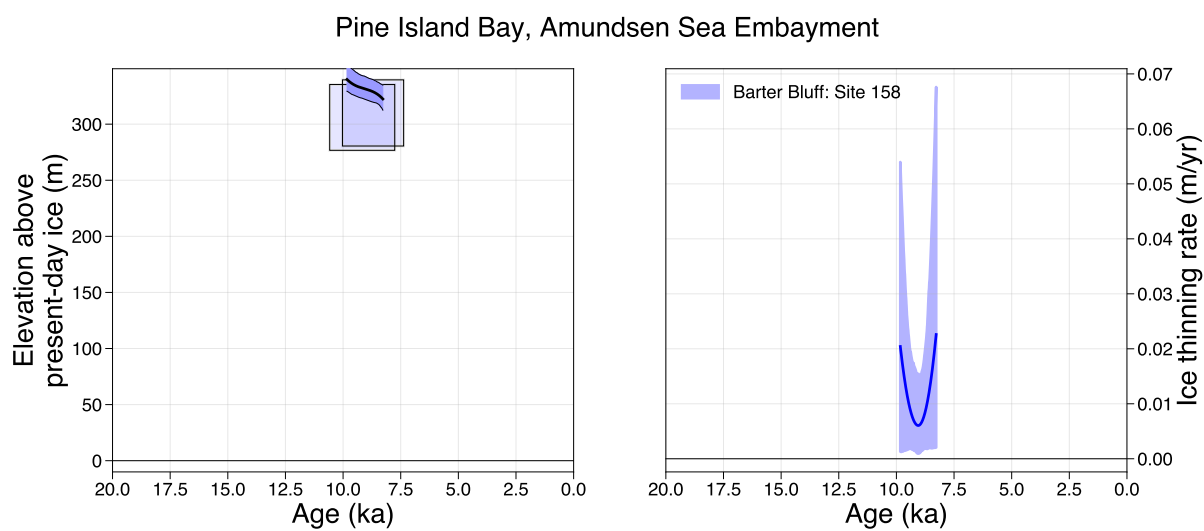

**Fig. S67** Thinning histories from Pine Island Bay Amundsen Sea Embayment. Colored boxes mark cosmogenic nuclide exposure age data and/or radiocarbon-dated lakes. Gray boxes mark rejected data. Colored envelopes denote PATR median and 95% credible intervals for local Antarctic Ice Sheet elevation (left panel) and rate of thinning (right panel).

3600  
3601  
3602  
3603  
3604  
3605  
3606  
3607  
3608  
3609  
3610  
3611  
3612  
3613  
3614  
3615  
3616  
3617  
3618  
3619  
3620  
3621  
3622  
3623  
3624  
3625  
3626  
3627  
3628  
3629  
3630  
3631  
3632  
3633  
3634  
3635  
3636  
3637  
3638  
3639  
3640  
3641  
3642  
3643  
3644  
3645  
3646  
3647  
3648  
3649  
3650  
3651  
3652  
3653  
3654  
3655  
3656  
3657  
3658

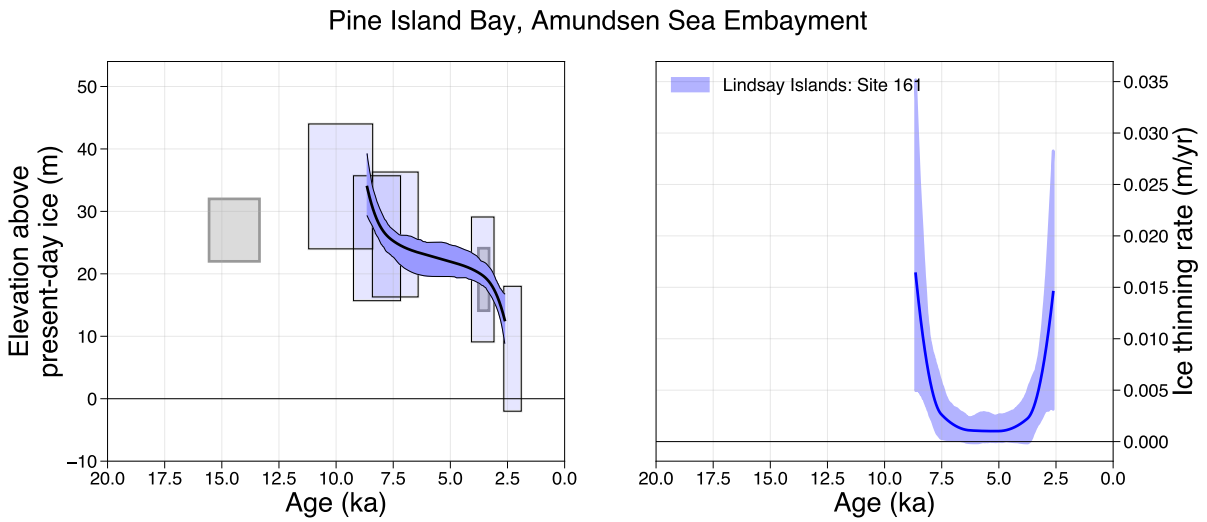

**Fig. S68** Thinning histories from Pine Island Bay Amundsen Sea Embayment. Colored boxes mark cosmogenic nuclide exposure age data and/or radiocarbon-dated lakes. Gray boxes mark rejected data. Colored envelopes denote PATR median and 95% credible intervals for local Antarctic Ice Sheet elevation (left panel) and rate of thinning (right panel).

3659  
3660  
3661  
3662  
3663  
3664  
3665  
3666  
3667  
3668  
3669  
3670  
3671  
3672  
3673  
3674  
3675  
3676  
3677  
3678  
3679  
3680  
3681  
3682  
3683  
3684  
3685  
3686  
3687  
3688  
3689  
3690  
3691  
3692  
3693  
3694  
3695  
3696  
3697  
3698  
3699  
3700  
3701  
3702  
3703  
3704  
3705  
3706  
3707  
3708  
3709  
3710  
3711  
3712  
3713  
3714  
3715  
3716  
3717

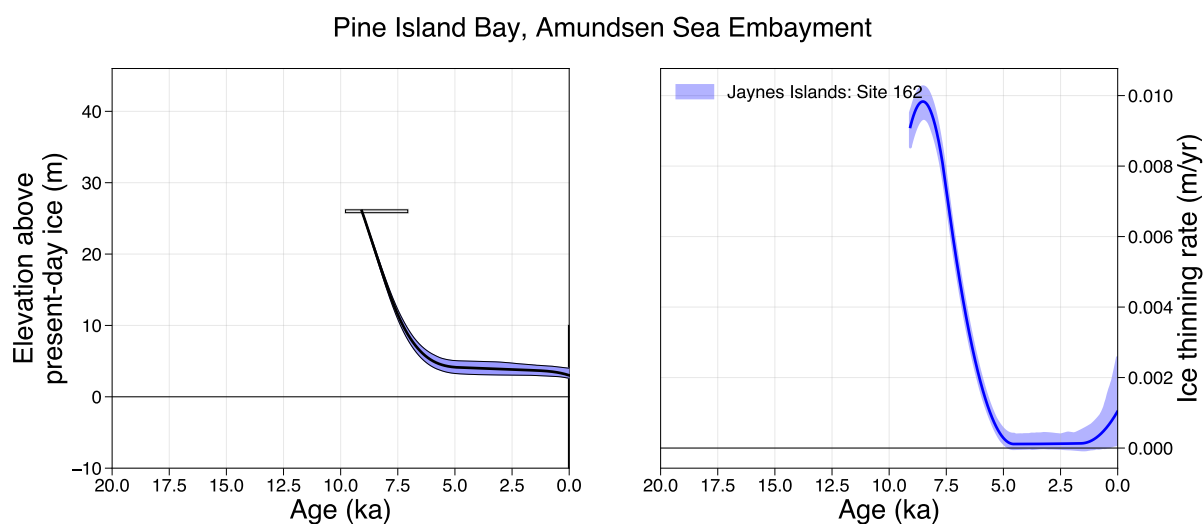

**Fig. S69** Thinning histories from Pine Island Bay Amundsen Sea Embayment. Colored boxes mark cosmogenic nuclide exposure age data and/or radiocarbon-dated lakes. Gray boxes mark rejected data. Colored envelopes denote PATR median and 95% credible intervals for local Antarctic Ice Sheet elevation (left panel) and rate of thinning (right panel).

3718  
 3719  
 3720  
 3721  
 3722  
 3723  
 3724  
 3725  
 3726  
 3727  
 3728  
 3729  
 3730  
 3731  
 3732  
 3733  
 3734  
 3735  
 3736  
 3737  
 3738  
 3739  
 3740  
 3741  
 3742  
 3743  
 3744  
 3745  
 3746  
 3747  
 3748  
 3749  
 3750  
 3751  
 3752  
 3753  
 3754  
 3755  
 3756  
 3757  
 3758  
 3759  
 3760  
 3761  
 3762  
 3763  
 3764  
 3765  
 3766  
 3767  
 3768  
 3769  
 3770  
 3771  
 3772  
 3773  
 3774  
 3775  
 3776

Hudson Mountains, Amundsen Sea Embayment

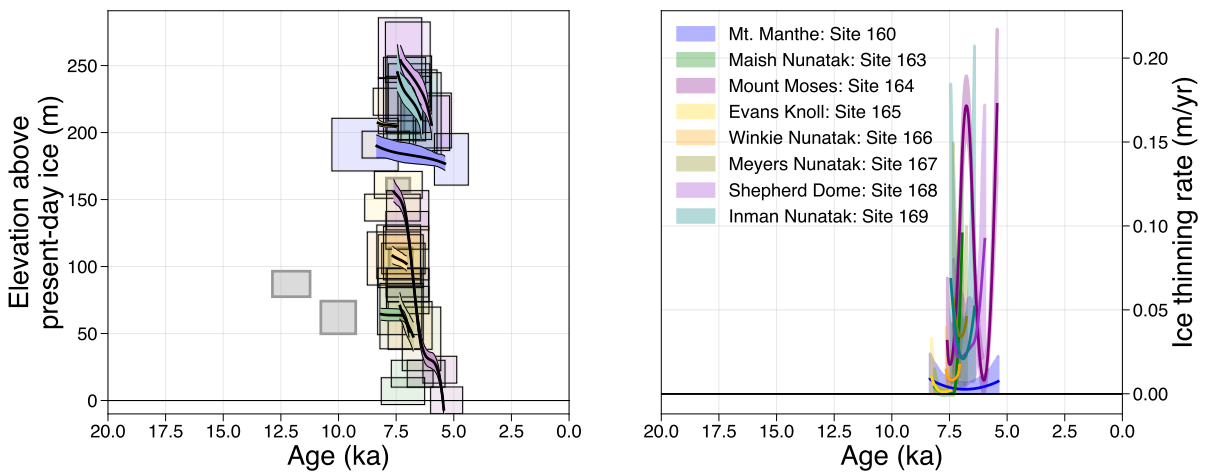

**Fig. S70** Thinning histories from Hudson Mountains Amundsen Sea Embayment . Colored boxes mark cosmogenic nuclide exposure age data and/or radiocarbon-dated lakes. Gray boxes mark rejected data. Colored envelopes denote PATR median and 95% credible intervals for local Antarctic Ice Sheet elevation (left panel) and rate of thinning (right panel).

## References

- [1] Seroussi, H. *et al.* Evolution of the Antarctic Ice Sheet Over the Next Three Centuries From an ISMIP6 Model Ensemble. *Earth's Future* **12**, e2024EF004561 (2024). URL <https://onlinelibrary.wiley.com/doi/abs/10.1029/2024EF004561>. [\\_eprint: https://agupubs.onlinelibrary.wiley.com/doi/pdf/10.1029/2024EF004561](https://agupubs.onlinelibrary.wiley.com/doi/pdf/10.1029/2024EF004561).
- [2] Grieman, M. M. *et al.* Abrupt Holocene ice loss due to thinning and ungrounding in the Weddell Sea Embayment. *Nature Geoscience* **17**, 227–232 (2024). URL <https://www.nature.com/articles/s41561-024-01375-8>.

3777  
3778  
3779  
3780  
3781  
3782  
3783  
3784  
3785  
3786  
3787  
3788  
3789  
3790  
3791  
3792  
3793  
3794  
3795  
3796  
3797  
3798  
3799  
3800  
3801  
3802  
3803  
3804  
3805  
3806  
3807  
3808  
3809  
3810  
3811  
3812  
3813  
3814  
3815  
3816  
3817  
3818  
3819  
3820  
3821  
3822  
3823  
3824  
3825  
3826  
3827  
3828  
3829  
3830  
3831  
3832  
3833  
3834  
3835
